# Supplementary material for: Doubly σ- and π-aromatic planar pentacoordinate boron polyanions
Source: Royal Society of Chemistry journal article supplement (doi:10.1039/d4cc05776g), 2024-12-03
Supplement: d4cc05776g1.pdf [file d4cc05776g1.pdf]

SUPPORTING INFORMATION

# Doubly $\sigma$ - and $\pi$ -Aromatic Planar Pentacoordinate Boron Polyanions

Williams García-Argote,<sup>ab†</sup> Dumer S. Sacanamboy,<sup>ab†</sup> Alejandro Vasquez-Espinal<sup>c</sup>, Diego Inostroza,<sup>d</sup> Luis Leyva-Parra,<sup>\*e</sup> Osvaldo Yáñez,<sup>\*f</sup> and William Tiznado<sup>\*a</sup>

<sup>a</sup> *Centro de Química Teórica & Computacional (CQT&C), Facultad de Ciencias Exactas, Departamento de Ciencias Químicas, Universidad Andrés Bello, Avenida República 275, Santiago 837014, Chile. [wtiznado@unab.cl](mailto:wtiznado@unab.cl)*

<sup>b</sup> *Doctorado en Fisicoquímica Molecular, Facultad de Ciencias Exactas, Universidad Andrés Bello, República 275, Santiago 837014, Chile.*

<sup>c</sup> *Química y Farmacia, Facultad de Ciencias de la Salud, Universidad Arturo Prat, Casilla 121, Iquique 1100000, Chile*

<sup>d</sup> *Departamento de Física, Facultad de Ciencias, Universidad de Chile, Ñuñoa, Santiago 7800024, Chile*

<sup>e</sup> *Facultad de Ingeniería y Arquitectura, Universidad Central de Chile (UCEN), Santa Isabel 1186, Santiago 8370146, Chile. [luis.leyva@ucentral.cl](mailto:luis.leyva@ucentral.cl)*

<sup>f</sup> *Núcleo de Investigación en Data Science (NIDS), Facultad de Ingeniería y Negocios, Universidad de Las Américas, Santiago 7500975, Chile. [oyanez@udla.cl](mailto:oyanez@udla.cl)*

## Computational Details

We systematically explored the potential energy surface using AUTOMATON,<sup>1</sup> which employs probabilistic cellular automata to generate initial structures and genetic algorithms to evolve them towards the global minimum. Calculations for singlet and triplet states were performed at the PBE0<sup>2</sup>-D3<sup>3</sup>/SDDAll<sup>4-8</sup> level. The lowest energy structures (Figure S1) were minimized at the PBE0-D3/def2-TZVP<sup>9</sup> level. For accurate energy comparisons, we conducted single-point energy calculations at the DLPNO-CCSD(T)<sup>10-12</sup>/CBS<sup>13,14</sup>//PBE0-D3/def2-TZVP level via Gaussian 16 software.<sup>15</sup> Chemical bonding was analyzed using the Adaptive Natural Density Partitioning<sup>16-18</sup> (AdNDP) technique via Multiwfn software.<sup>19</sup> Structure and AdNDP orbitals were visualized using CYLview 2.0<sup>20</sup> and VMD 1.9.3.<sup>21</sup>

The Interacting Quantum Atoms (IQA) method<sup>22-25</sup> was employed to decompose the interaction energy. The IQA analysis, which balances atomic deformation against additive interatomic interaction energies, was conducted at the PBE0-D3/def2-TZVP level using the AIMAll program.<sup>26</sup> The interaction energy,  $V_{IQA}^{int}$ , is the sum of the Coulombic,  $V_C^{int}$ , and exchange-correlation,  $V_{XC}^{int}$ , terms.  $V_C^{int}$  represents the exact electrostatic interaction between electrons and nuclei in a pair of basins, including nuclear repulsion, electron-nucleus attraction, and the Coulomb part of electron-electron repulsion.  $V_{XC}^{int}$  is purely quantum mechanical, depending on the exchange-correlation part of electron-electron interaction. Typically,  $V_C^{int}$  is associated with ionic-type interactions, while  $V_{XC}^{int}$  relates to covalent-type interactions.

The magnetically induced current density ( $J^{ind}$ ) was calculated using the SYSMOIC program.<sup>27</sup> The external magnetic field was aligned parallel to the z-axis and perpendicular to the molecular plane using the CTOCD-DZ method to ensure origin-independent results. The Gaussian16 program was employed to obtain the perturbed molecular orbital with the CSGT keyword, which was then used to perform the actual calculation of density current.

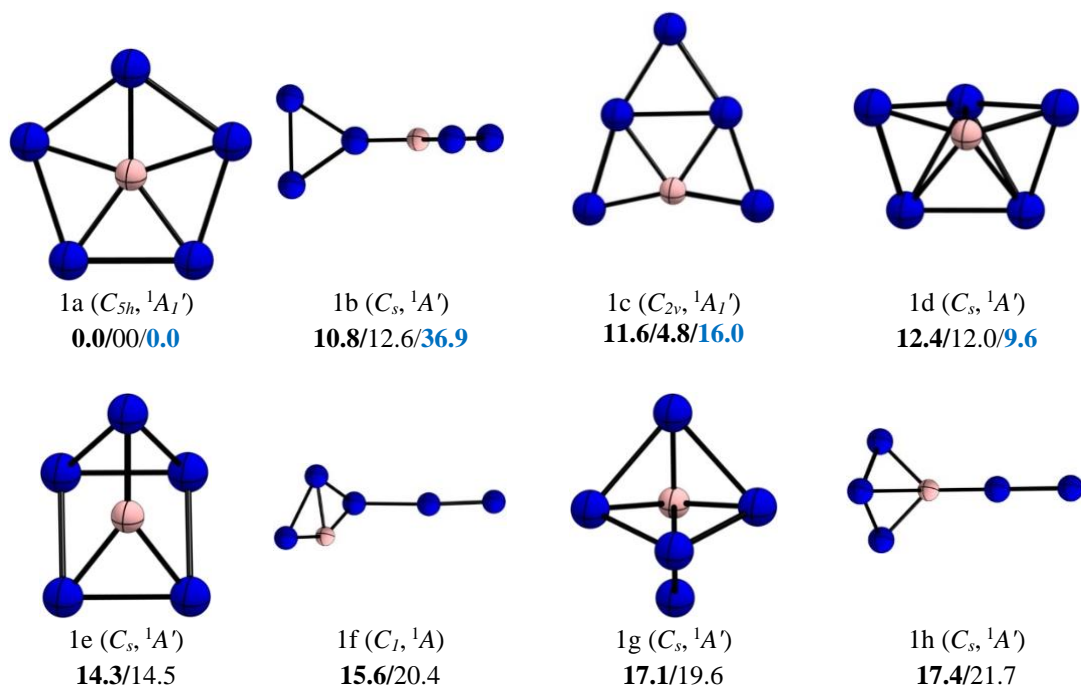

**Figure S1.** PBE0-D3/def2-TZVP geometries of the low-lying energy isomer of  $\text{BSi}_5^{3-}$ . Relative energies in  $\text{kcal}\cdot\text{mol}^{-1}$  computed at DLPNO-CCSD(T)/CSB//PBE0-D3/def2-TZVP (**bold**), PBE0-D3/def2-TZVP including zero-point energy (ZPE) corrections and PBE0-PCM-D3/def2-TZVP (**blue**) levels. Point groups and spectroscopic states are also reported.

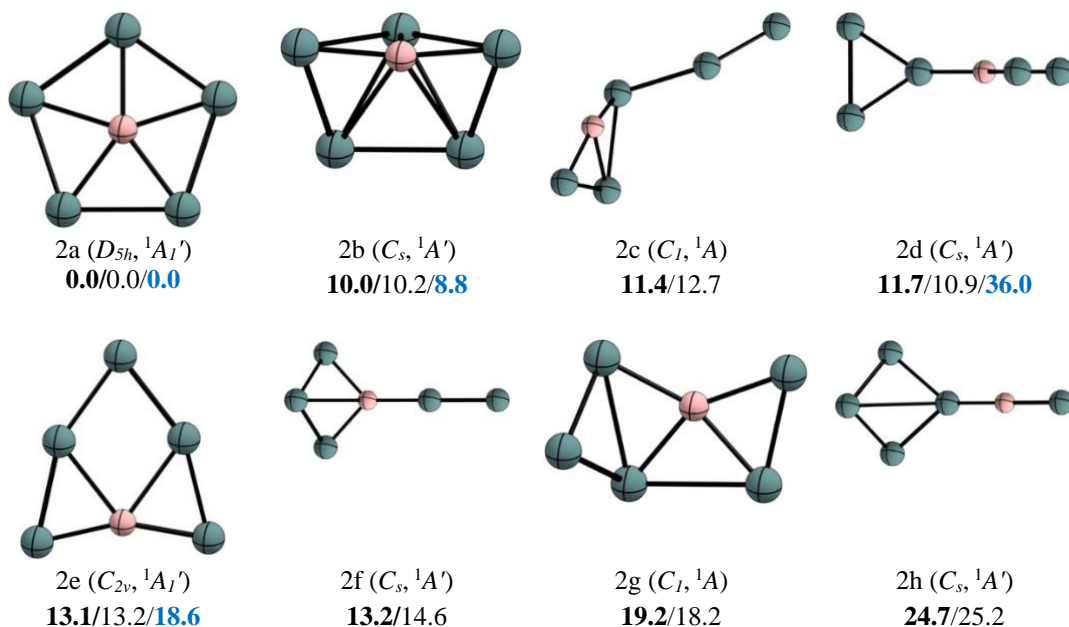

**Figure S2.** PBE0-D3/def2-TZVP geometries of the low-lying energy isomer of  $\text{BGe}_5^{3-}$ . Relative energies in  $\text{kcal}\cdot\text{mol}^{-1}$  computed at DLPNO-CCSD(T)/CSB//PBE0-D3/def2-TZVP (**bold**), PBE0-D3/def2-TZVP including zero-point energy (ZPE) corrections and PBE0-PCM-D3/def2-TZVP (**blue**) levels. Point groups and spectroscopic states are also reported.

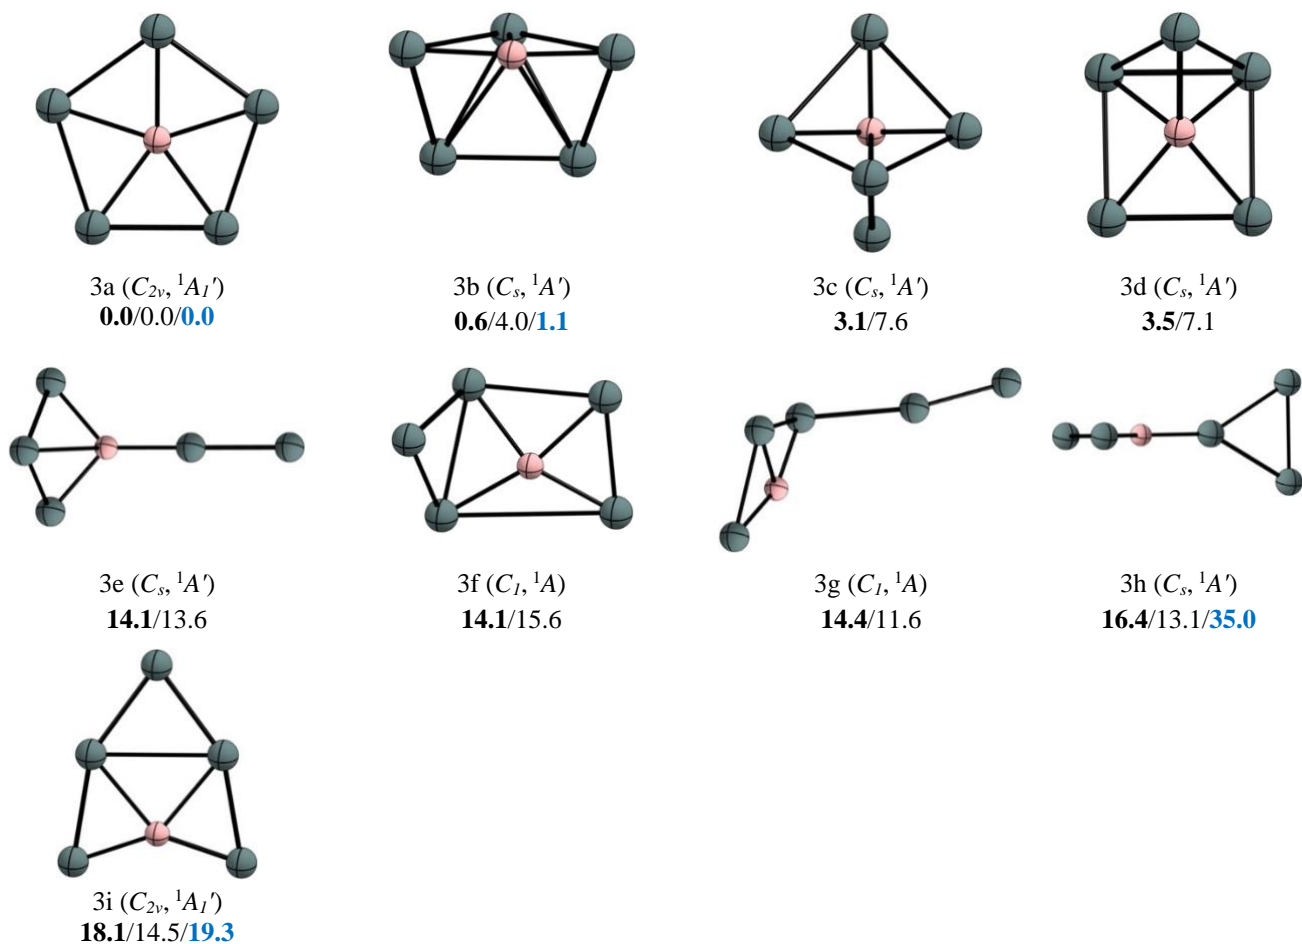

**Figure S3.** PBE0-D3/def2-TZVP geometries of the low-lying energy isomer of  $BSn_5^{3-}$ . Relative energies in  $\text{kcal}\cdot\text{mol}^{-1}$  computed at DLPNO-CCSD(T)/CSB//PBE0-D3/def2-TZVP (**bold**), PBE0-D3/def2-TZVP including zero-point energy (ZPE) corrections and PBE0-PCM-D3/def2-TZVP (**blue**) levels. Point groups and spectroscopic states are also reported.

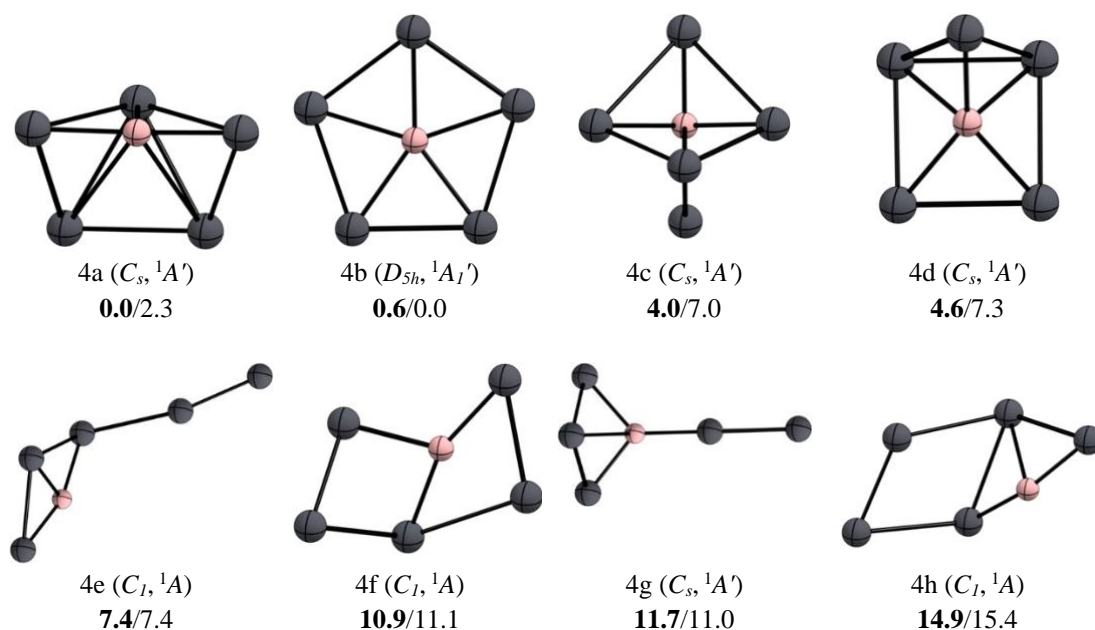

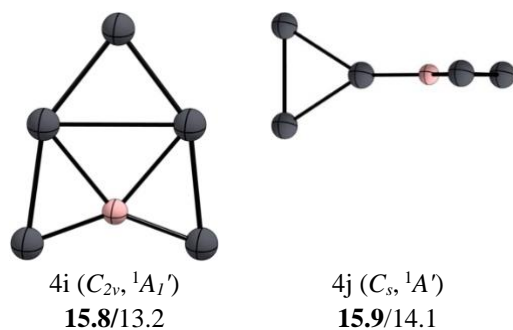

**Figure S4.** PBE0-D3/def2-TZVP geometries of the low-lying energy isomer of  $CSi_5^{2-}$ . Relative energies in  $\text{kcal}\cdot\text{mol}^{-1}$  computed at DLPNO-CCSD(T)/CSB//PBE0-D3/def2-TZVP (**bold**) and PBE0-D3/def2-TZVP including zero-point energy (ZPE) corrections levels. Point groups and spectroscopic states are also reported.

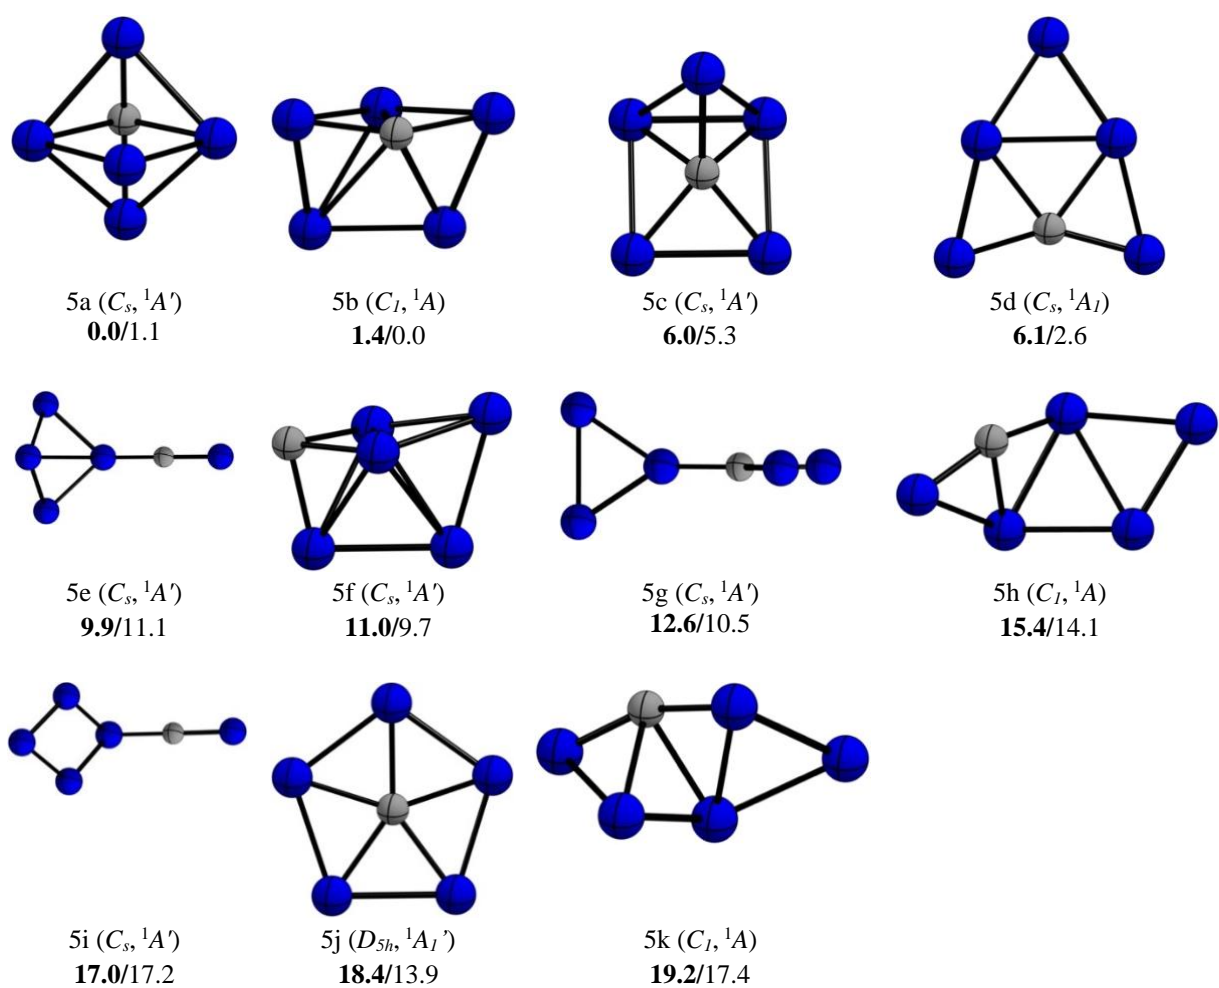

**Figure S5.** PBE0-D3/def2-TZVP geometries of the low-lying energy isomer of  $CSi_5^{2-}$ . Relative energies in  $\text{kcal}\cdot\text{mol}^{-1}$  computed at DLPNO-CCSD(T)/CSB//PBE0-D3/def2-TZVP (**bold**) and PBE0-D3/def2-TZVP including zero-point energy (ZPE) corrections levels. Point groups and spectroscopic states are also reported.

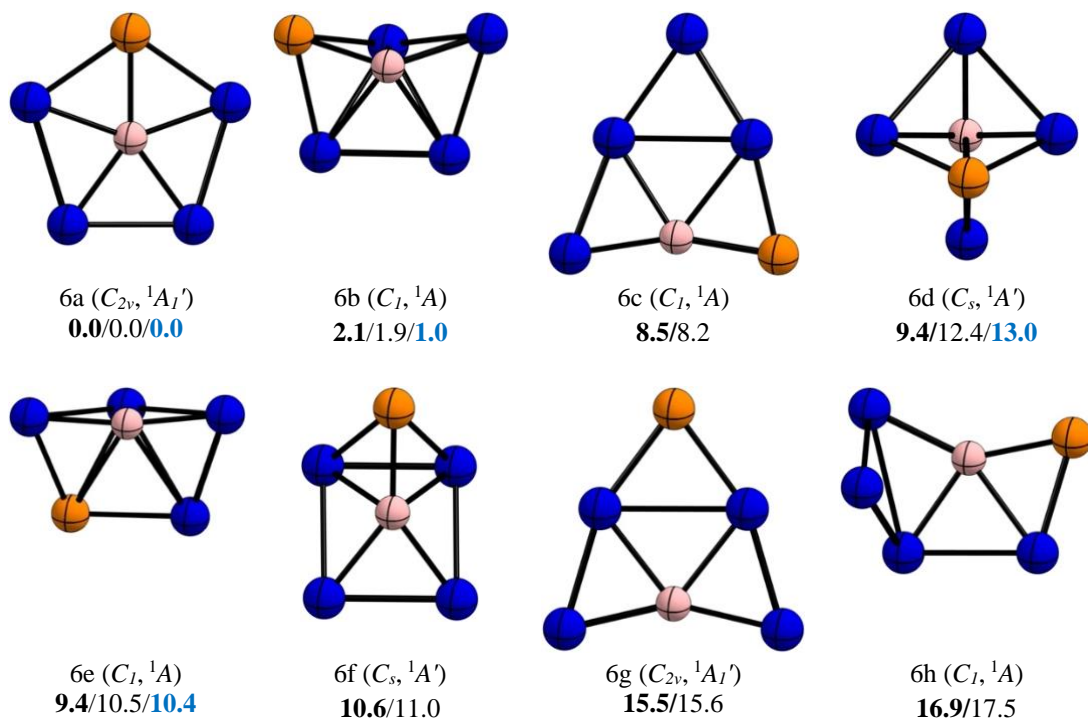

**Figure S6.** PBE0-D3/def2-TZVP geometries of the low-lying energy isomer of  $BPSi_4^{2-}$ . Relative energies in kcal·mol<sup>-1</sup> computed at DLPNO-CCSD(T)/CSB//PBE0-D3/def2-TZVP (**bold**), PBE0-D3/def2-TZVP including zero-point energy (ZPE) corrections and PBE0-PCM-D3/def2-TZVP (**blue**) levels. Point groups and spectroscopic states are also reported.

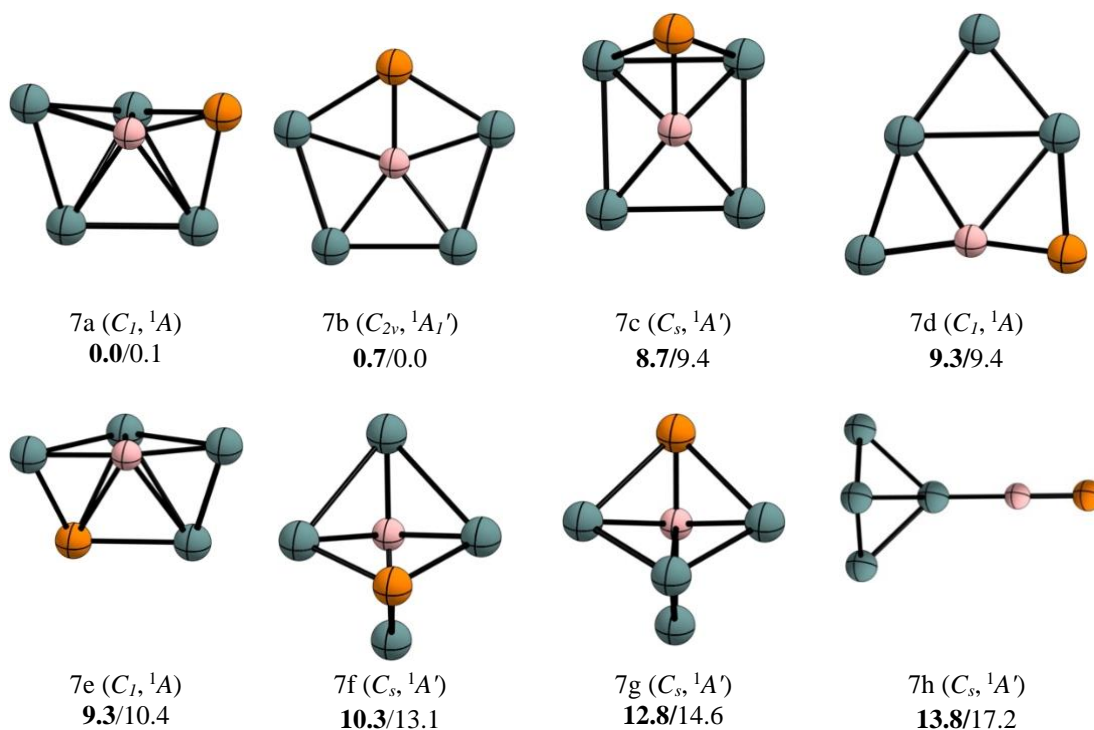

**Figure S7.** PBE0-D3/def2-TZVP geometries of the low-lying energy isomer of  $BPGe_4^{2-}$ . Relative energies in kcal·mol<sup>-1</sup> computed at DLPNO-CCSD(T)/CSB//PBE0-D3/def2-TZVP (**bold**) and PBE0-D3/def2-TZVP including zero-point energy (ZPE) corrections and PBE0-PCM-D3/def2-TZVP (**blue**) levels. Point groups and spectroscopic states are also reported.

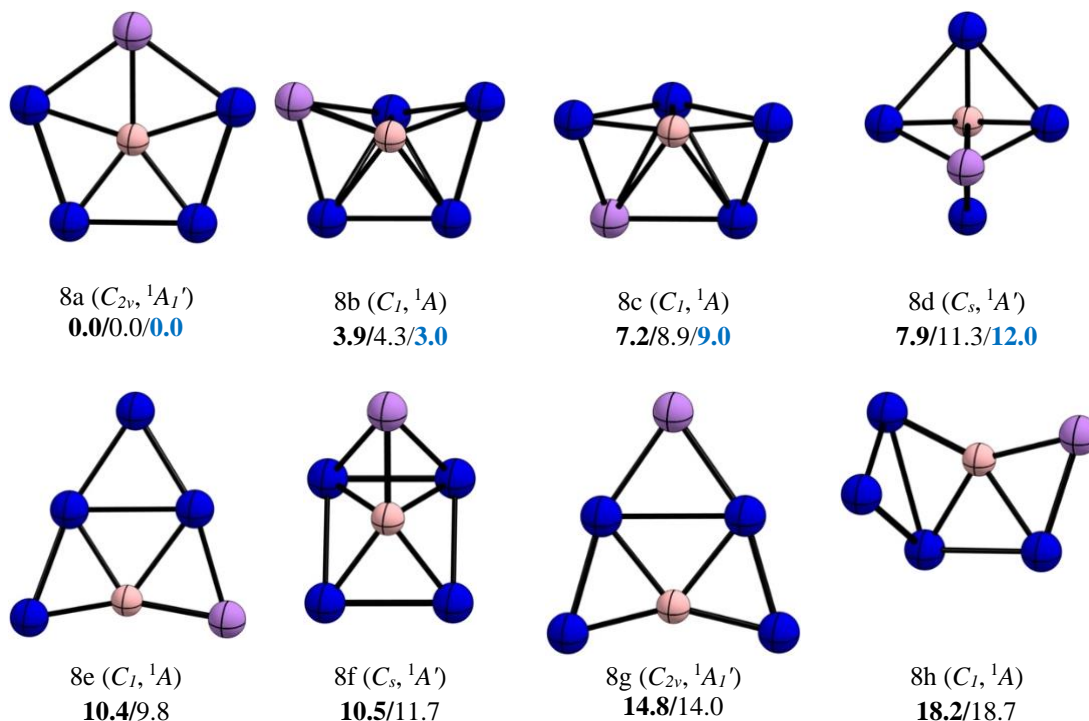

**Figure S8.** PBE0-D3/def2-TZVP geometries of the low-lying energy isomer of  $BAsSi_4^{2-}$ . Relative energies in kcal·mol<sup>-1</sup> computed at DLPNO-CCSD(T)/CSB//PBE0-D3/def2-TZVP (**bold**), PBE0-D3/def2-TZVP including zero-point energy (ZPE) corrections and PBE0-PCM-D3/def2-TZVP (**blue**) levels. Point groups and spectroscopic states are also reported.

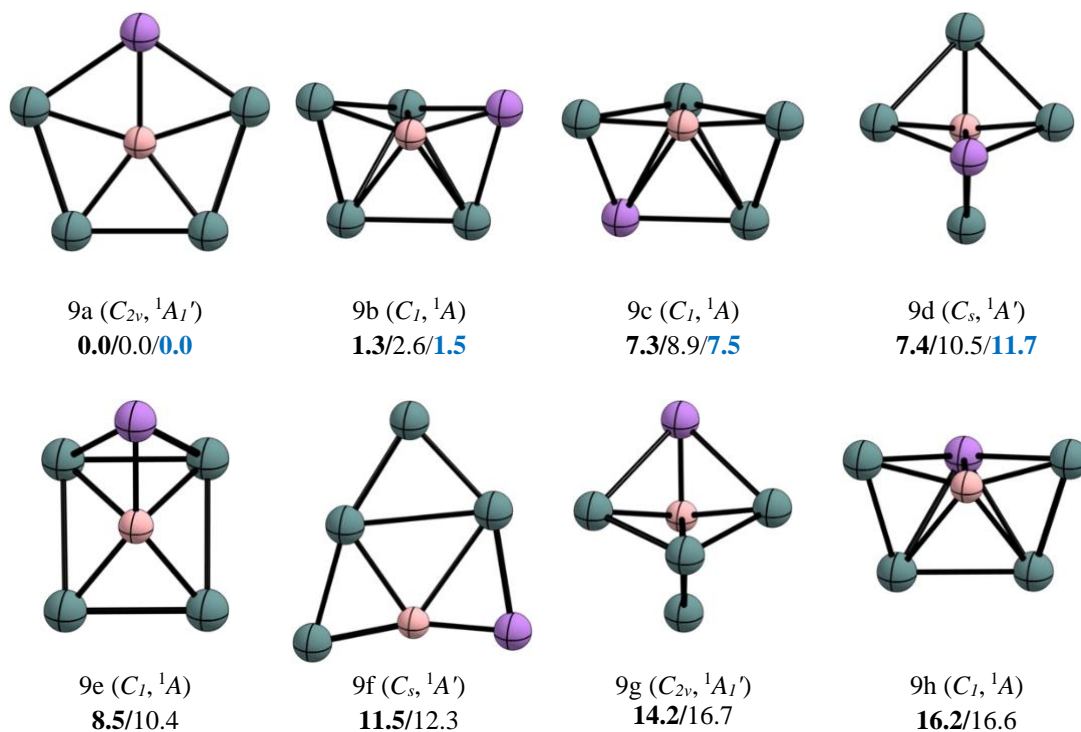

**Figure S9.** PBE0-D3/def2-TZVP geometries of the low-lying energy isomer of  $BAsGe_4^{2-}$ . Relative energies in kcal·mol<sup>-1</sup> computed at DLPNO-CCSD(T)/CSB//PBE0-D3/def2-TZVP (**bold**), PBE0-D3/def2-TZVP including zero-point energy (ZPE) corrections and PBE0-PCM-D3/def2-TZVP (**blue**) levels. Point groups and spectroscopic states are also reported.

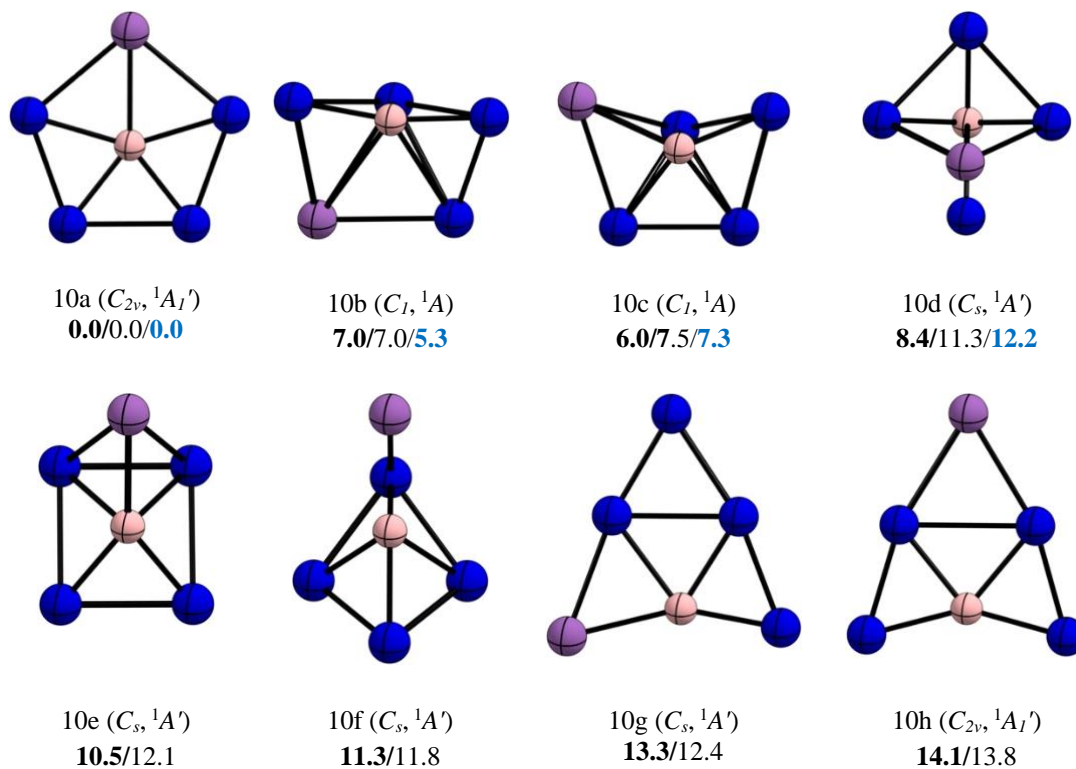

**Figure S10.** PBE0-D3/def2-TZVP geometries of the low-lying energy isomer of  $\text{BSbSi}_4^{2-}$ . Relative energies in  $\text{kcal}\cdot\text{mol}^{-1}$  computed at DLPNO-CCSD(T)/CSB//PBE0-D3/def2-TZVP (**bold**), PBE0-D3/def2-TZVP including zero-point energy (ZPE) corrections and PBE0-PCM-D3/def2-TZVP (**blue**) levels. Point groups and spectroscopic states are also reported.

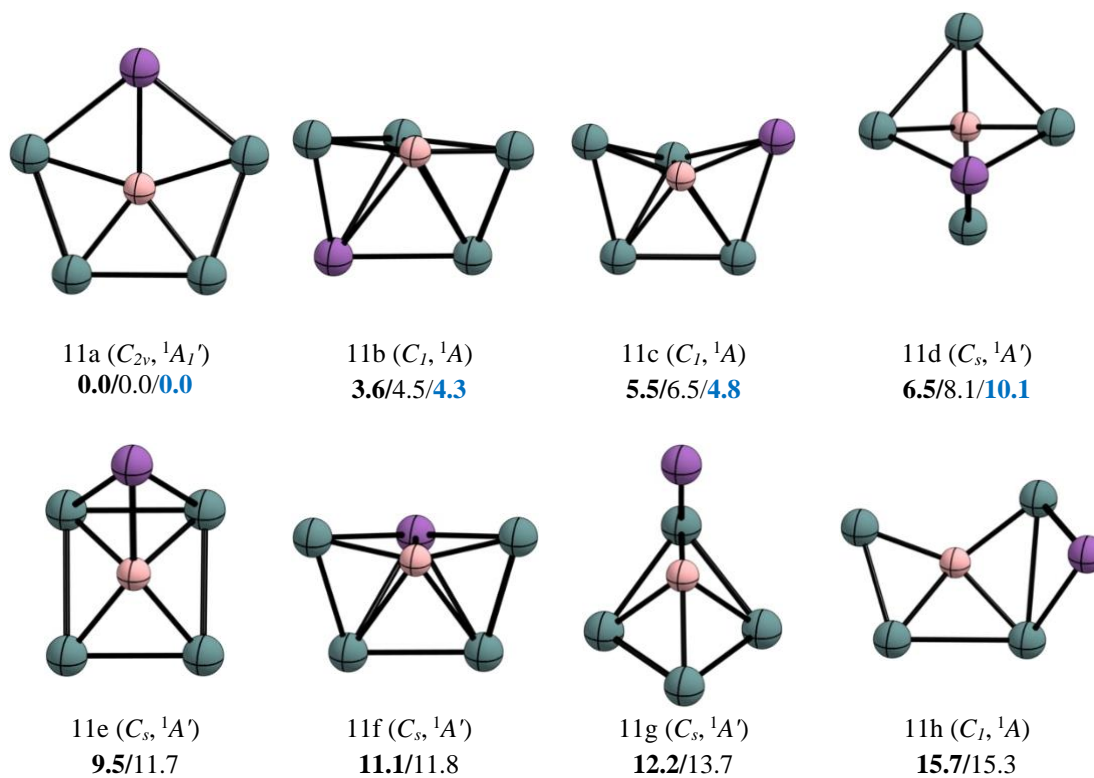

**Figure S11.** PBE0-D3/def2-TZVP geometries of the low-lying energy isomer of  $\text{BSbGe}_4^{2-}$ . Relative energies in  $\text{kcal}\cdot\text{mol}^{-1}$  computed at DLPNO-CCSD(T)/CSB//PBE0-D3/def2-TZVP (**bold**), PBE0-D3/def2-TZVP including zero-point energy (ZPE) corrections and PBE0-PCM-D3/def2-TZVP (**blue**) levels. Point groups and spectroscopic states are also reported.



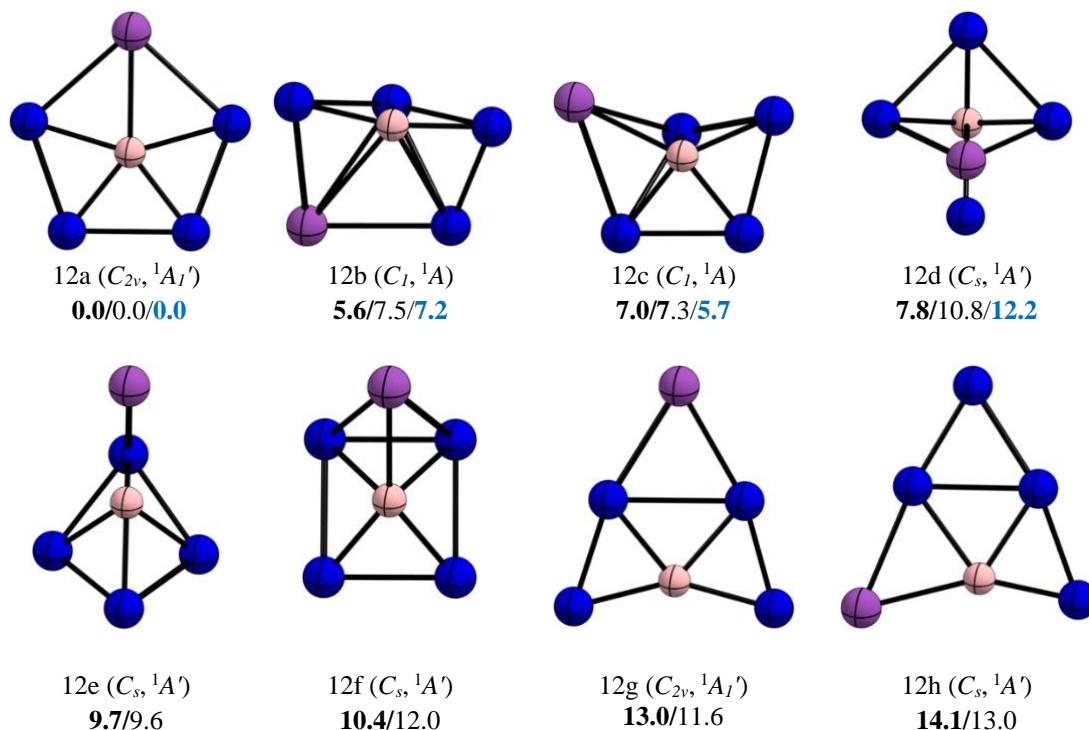

**Figure S12.** PBE0-D3/def2-TZVP geometries of the low-lying energy isomer of  $\text{BBiSi}_4^{2-}$ . Relative energies in  $\text{kcal}\cdot\text{mol}^{-1}$  computed at DLPNO-CCSD(T)/CSB//PBE0-D3/def2-TZVP (**bold**), PBE0-D3/def2-TZVP including zero-point energy (ZPE) corrections and PBE0-PCM-D3/def2-TZVP (**blue**) levels. Point groups and spectroscopic states are also reported.

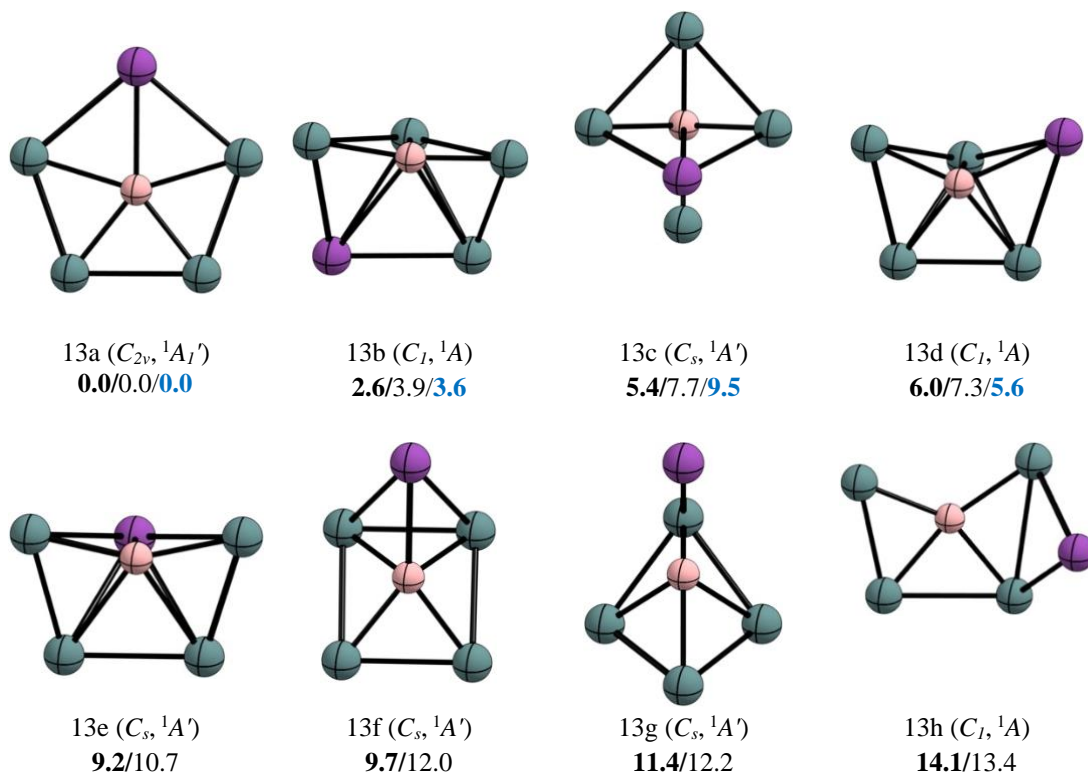

**Figure S13.** PBE0-D3/def2-TZVP geometries of the low-lying energy isomer of  $\text{BBiGe}_4^{2-}$ . Relative energies in  $\text{kcal}\cdot\text{mol}^{-1}$  computed at DLPNO-CCSD(T)/CSB//PBE0-D3/def2-TZVP (**bold**), PBE0-D3/def2-TZVP including zero-point energy (ZPE) corrections and PBE0-PCM-D3/def2-TZVP (**blue**) levels. Point groups and spectroscopic states are also reported.

**Table S1.** Relative energies in kcal·mol<sup>-1</sup> of ETr<sub>n</sub>Pn<sub>m</sub><sup>q</sup> (E=B-Tl, Tr = Si-Pb, Pn =P-Bi n=5-0, m=0-5 and q= -2, -1, 0, 1, 2) and their lowest harmonic vibrational frequency in cm<sup>-1</sup> computed at the PBE0-D3/def2-TZVP level. Point groups also reported.

| System                                        | $\Delta E$ | $\nu_{\min}$ | Point group     | System                                        | $\Delta E$ | $\nu_{\min}$ | Point group     | System                           | $\Delta E$ | $\nu_{\min}$ | Point group     |
|-----------------------------------------------|------------|--------------|-----------------|-----------------------------------------------|------------|--------------|-----------------|----------------------------------|------------|--------------|-----------------|
| BSi <sub>4</sub> P <sup>2-</sup>              | 0.0        | 177.1        | C <sub>2v</sub> | BSn <sub>2</sub> P <sub>3</sub>               | 14.9       | 73.3         | C <sub>2v</sub> | BPb <sub>2</sub> Bi <sub>3</sub> | 14.6       | 33.7         | C <sub>2v</sub> |
| BSi <sub>3</sub> P <sub>2</sub> <sup>-</sup>  | 8.7        | 153.1        | C <sub>2v</sub> | BSnP <sub>4</sub> <sup>+</sup>                | 15.7       | 57.2         | C <sub>2v</sub> | BPbBi <sub>4</sub> <sup>+</sup>  | 18.0       | 31.6         | C <sub>2v</sub> |
| BSi <sub>2</sub> P <sub>3</sub>               | 7.7        | 105.3        | C <sub>2v</sub> | BSn <sub>4</sub> As <sup>2-</sup>             | 6.1        | 59.0         | C <sub>2v</sub> | BP <sub>5</sub> <sup>2+</sup>    | 4.8        | 193.6        | C <sub>5v</sub> |
| BSiP <sub>4</sub> <sup>+</sup>                | 9.4        | 92.3         | C <sub>s</sub>  | BSn <sub>3</sub> As <sub>2</sub> <sup>-</sup> | 15.9       | 65.2         | C <sub>2v</sub> | BAs <sub>5</sub> <sup>2+</sup>   | 8.5        | 63.0         | D <sub>5h</sub> |
| BSi <sub>4</sub> As <sup>2-</sup>             | 0.0        | 154.1        | C <sub>2v</sub> | BSn <sub>2</sub> As <sub>3</sub>              | 14.3       | 58.8         | C <sub>2v</sub> | BSb <sub>5</sub> <sup>2+</sup>   | 15.4       | 51.8         | D <sub>5h</sub> |
| BSi <sub>3</sub> As <sub>2</sub> <sup>-</sup> | 5.9        | 146.2        | C <sub>2v</sub> | BSnAs <sub>4</sub> <sup>+</sup>               | 15.3       | 59.4         | C <sub>2v</sub> | BBi <sub>5</sub> <sup>2+</sup>   | 19.4       | 32.9         | D <sub>5h</sub> |
| BSi <sub>2</sub> As <sub>3</sub>              | 3.1        | 123.5        | C <sub>2v</sub> | BSn <sub>4</sub> Sb <sup>2-</sup>             | 2.3        | 55.3         | C <sub>2v</sub> | AlSi <sub>5</sub> <sup>3-</sup>  | 32.0       | 175.0        | C <sub>5v</sub> |
| BSiAs <sub>4</sub> <sup>+</sup>               | 6.2        | 105.0        | C <sub>2v</sub> | BSn <sub>3</sub> Sb <sub>2</sub> <sup>-</sup> | 11.2       | 52.3         | C <sub>2v</sub> | AlGe <sub>5</sub> <sup>3-</sup>  | 11.6       | 97.2         | C <sub>5v</sub> |
| BSi <sub>4</sub> Sb <sup>2-</sup>             | 0.0        | 136.3        | C <sub>2v</sub> | BGeBi <sub>4</sub> <sup>+</sup>               | 14.3       | 40.9         | C <sub>2v</sub> | AlSn <sub>5</sub> <sup>3-</sup>  | 5.5        | 59.0         | C <sub>5v</sub> |
| BSi <sub>3</sub> Sb <sub>2</sub> <sup>-</sup> | 1.6        | 118.2        | C <sub>2v</sub> | BSn <sub>4</sub> P <sup>2-</sup>              | 8.2        | 61.0         | C <sub>2v</sub> | AlPb <sub>5</sub> <sup>3-</sup>  | 1.2        | 36.9         | C <sub>5v</sub> |
| BSi <sub>2</sub> Sb <sub>3</sub>              | 5.2        | 80.1         | C <sub>2v</sub> | BSn <sub>3</sub> P <sub>2</sub> <sup>-</sup>  | 9.4        | 9.2          | C <sub>2v</sub> | GaSi <sub>5</sub> <sup>3-</sup>  | -          | -            | -               |
| BSiSb <sub>4</sub> <sup>+</sup>               | 9.4        | 62.3         | C <sub>2v</sub> | BSn <sub>2</sub> Sb <sub>3</sub>              | 12.0       | 51.9         | C <sub>2v</sub> | GaGe <sub>5</sub> <sup>3-</sup>  | 16.7       | 94.0         | C <sub>5v</sub> |
| BSi <sub>4</sub> Bi <sup>2-</sup>             | 0.0        | 127.6        | C <sub>2v</sub> | BSnSb <sub>4</sub> <sup>+</sup>               | 14.5       | 48.3         | C <sub>2v</sub> | GaSn <sub>5</sub> <sup>3-</sup>  | 11.0       | 49.2         | C <sub>5v</sub> |
| BSi <sub>3</sub> Bi <sub>2</sub> <sup>-</sup> | 4.8        | 104.9        | C <sub>2v</sub> | BSn <sub>4</sub> Bi <sup>2-</sup>             | 1.0        | 51.0         | C <sub>2v</sub> | GaPb <sub>5</sub> <sup>3-</sup>  | 6.6        | 27.1         | C <sub>5v</sub> |
| BSi <sub>2</sub> Bi <sub>3</sub>              | 8.1        | 62.9         | C <sub>2v</sub> | BSn <sub>3</sub> Bi <sub>2</sub> <sup>-</sup> | 9.4        | 46.4         | C <sub>2v</sub> | InSi <sub>5</sub> <sup>3-</sup>  | -          | -            | -               |
| BSiBi <sub>4</sub> <sup>+</sup>               | 14.8       | 43.0         | C <sub>2v</sub> | BSn <sub>2</sub> Bi <sub>3</sub>              | 10.4       | 40.3         | C <sub>2v</sub> | InGe <sub>5</sub> <sup>3-</sup>  | -          | -            | -               |
| BGe <sub>4</sub> P <sup>2-</sup>              | 0.0        | 99.0         | C <sub>2v</sub> | BSnBi <sub>4</sub> <sup>+</sup>               | 15.7       | 37.6         | C <sub>2v</sub> | InSn <sub>5</sub> <sup>3-</sup>  | 27.7       | 58.6         | C <sub>5v</sub> |
| BGe <sub>3</sub> P <sub>2</sub> <sup>-</sup>  | 10.5       | 120.8        | C <sub>2v</sub> | BPb <sub>4</sub> P <sup>2-</sup>              | 11.0       | 43.2         | C <sub>2v</sub> | InPb <sub>5</sub> <sup>3-</sup>  | 21.0       | 40.0         | C <sub>5v</sub> |
| BGe <sub>2</sub> P <sub>3</sub>               | 10.7       | 88.6         | C <sub>2v</sub> | BPb <sub>3</sub> P <sub>2</sub> <sup>-</sup>  | 23.5       | 67.9         | C <sub>2v</sub> | TlSi <sub>5</sub> <sup>3-</sup>  | -          | -            | -               |
| BGeP <sub>4</sub> <sup>+</sup>                | 13.0       | 43.9         | C <sub>s</sub>  | BPb <sub>2</sub> P <sub>3</sub>               | 16.5       | 65.9         | C <sub>2v</sub> | TlGe <sub>5</sub> <sup>3-</sup>  | -          | -            | -               |
| BGe <sub>4</sub> As <sup>2-</sup>             | 0.0        | 96.3         | C <sub>2v</sub> | BPbP <sub>4</sub> <sup>+</sup>                | 17.2       | 57.8         | C <sub>2v</sub> | TlSn <sub>5</sub> <sup>3-</sup>  | -          | -            | -               |
| BGe <sub>3</sub> As <sub>2</sub> <sup>-</sup> | 7.4        | 93.1         | C <sub>2v</sub> | BPb <sub>4</sub> As <sup>2-</sup>             | 9.2        | 41.9         | C <sub>2v</sub> | TlPb <sub>5</sub> <sup>3-</sup>  | 29.7       | 39.3         | C <sub>5v</sub> |
| BGe <sub>2</sub> As <sub>3</sub>              | 7.7        | 87.6         | C <sub>2v</sub> | BPb <sub>3</sub> As <sub>2</sub> <sup>-</sup> | 20.3       | 51.0         | C <sub>2v</sub> |                                  |            |              |                 |
| BGeAs <sub>4</sub> <sup>+</sup>               | 10.5       | 81.1         | C <sub>2v</sub> | BPb <sub>2</sub> As <sub>3</sub>              | 17.0       | 47.7         | C <sub>2v</sub> |                                  |            |              |                 |
| BGe <sub>4</sub> Sb <sup>2-</sup>             | 0.0        | 85.7         | C <sub>2v</sub> | BPbAs <sub>4</sub> <sup>+</sup>               | 17.8       | 50.4         | C <sub>2v</sub> |                                  |            |              |                 |
| BGe <sub>3</sub> Sb <sub>2</sub> <sup>-</sup> | 1.5        | 75.2         | C <sub>2v</sub> | BPb <sub>4</sub> Sb <sup>2-</sup>             | 5.6        | 39.1         | C <sub>2v</sub> |                                  |            |              |                 |
| BGe <sub>2</sub> Sb <sub>3</sub>              | 5.7        | 67.8         | C <sub>2v</sub> | BPb <sub>3</sub> Sb <sub>2</sub> <sup>-</sup> | 14.7       | 41.4         | C <sub>2v</sub> |                                  |            |              |                 |
| BGeSb <sub>4</sub> <sup>+</sup>               | 10.9       | 59.7         | C <sub>2v</sub> | BPb <sub>2</sub> Sb <sub>3</sub>              | 15.6       | 41.1         | C <sub>2v</sub> |                                  |            |              |                 |
| BGe <sub>4</sub> Bi <sup>2-</sup>             | 0.0        | 78.1         | C <sub>2v</sub> | BPbSb <sub>4</sub> <sup>+</sup>               | 17.6       | 41.0         | C <sub>5v</sub> |                                  |            |              |                 |
| BGe <sub>3</sub> Bi <sub>2</sub> <sup>-</sup> | 1.6        | 63.1         | C <sub>2v</sub> | BPb <sub>4</sub> Bi <sup>2-</sup>             | 3.6        | 37.9         | C <sub>2v</sub> |                                  |            |              |                 |
| BGe <sub>2</sub> Bi <sub>3</sub>              | 7.0        | 50.7         | C <sub>2v</sub> | BPb <sub>3</sub> Bi <sub>2</sub> <sup>-</sup> | 12.7       | 35.1         | C <sub>2v</sub> |                                  |            |              |                 |

**Table S2.** Singlet-triplet energy gap in kcal·mol<sup>-1</sup>, smallest vibrational frequencies in cm<sup>-1</sup> and T<sub>1</sub> diagnostics for the global minimum of BTr<sub>5</sub><sup>3-</sup> (Tr = Si-Sn) and BTr<sub>4</sub>Pn<sup>2-</sup> (Tr = Si for Pn = P-Bi and Tr = Ge for Pn = As-Bi).

| System                                | $\Delta E_{S-T}$ | $\nu_{\min}$ | $T_1$ Diagnostic |
|---------------------------------------|------------------|--------------|------------------|
| <b>BSi<sub>5</sub><sup>3-</sup></b>   | 32.6             | 177.1        | 0.019            |
| <b>BGe<sub>5</sub><sup>3-</sup></b>   | 29.5             | 98.4         | 0.012            |
| <b>BSn<sub>5</sub><sup>3-</sup></b>   | 20.8             | 56.4         | 0.016            |
| <b>BSi<sub>4</sub>P<sup>2-</sup></b>  | 22.1             | 177.1        | 0.021            |
| <b>BSi<sub>4</sub>As<sup>2-</sup></b> | 30.4             | 154.1        | 0.018            |
| <b>BGe<sub>4</sub>As<sup>2-</sup></b> | 25.7             | 98.3         | 0.013            |
| <b>BSi<sub>4</sub>Sb<sup>2-</sup></b> | 22.4             | 136.3        | 0.019            |
| <b>BGe<sub>4</sub>Sb<sup>2-</sup></b> | 22.5             | 85.7         | 0.013            |
| <b>BSi<sub>4</sub>Bi<sup>2-</sup></b> | 20.5             | 127.6        | 0.020            |
| <b>BGe<sub>4</sub>Bi<sup>2-</sup></b> | 20.7             | 78.1         | 0.013            |

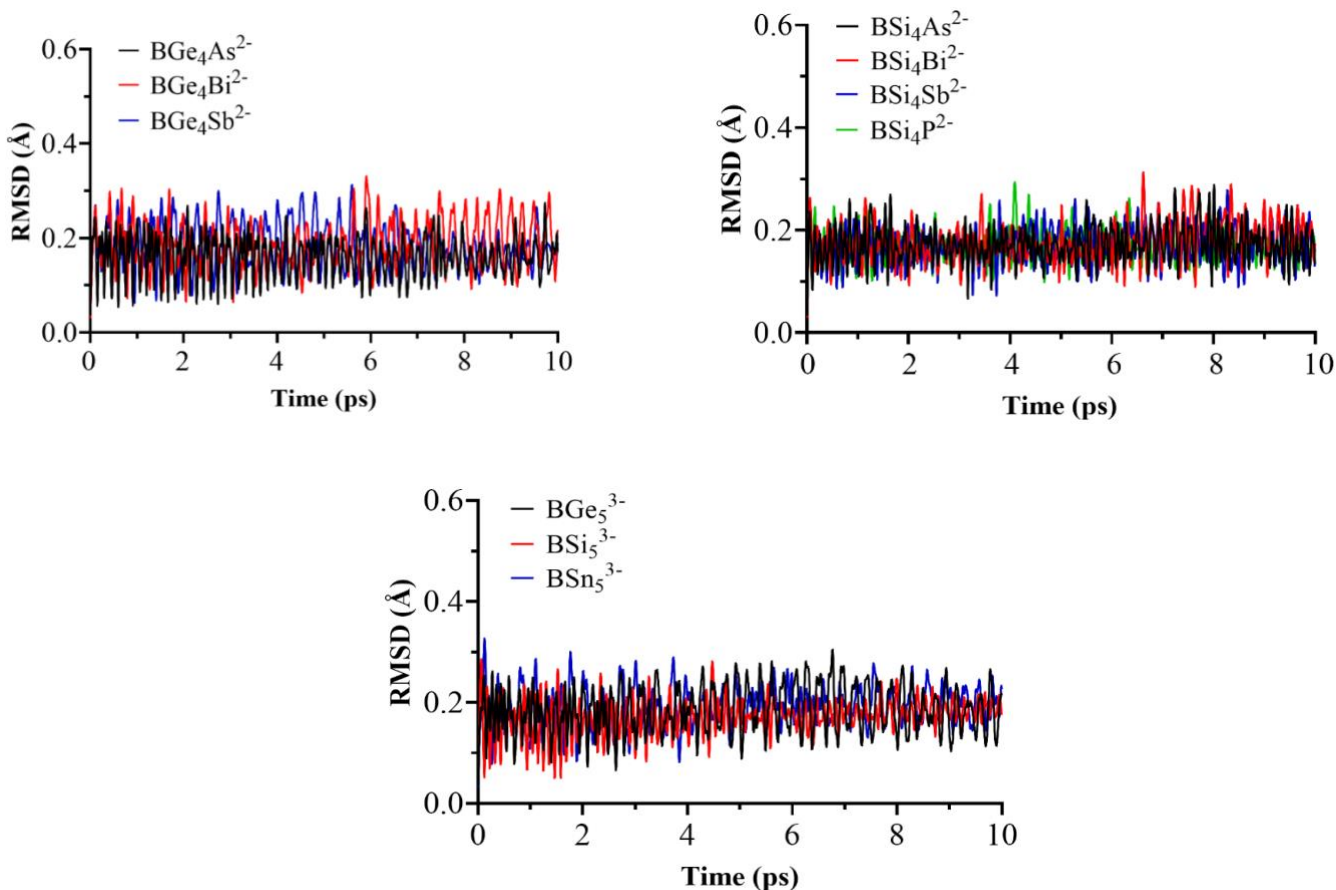

**Figure S14.** RMSD curves along the trajectories of Born-Oppenheimer molecular dynamics simulations for all global minima of ppB.

**Table S3.** Bond lengths ( $r$ , Å), natural charges ( $q$ , |e|) and Wiberg bond indices (WBI) of  $BTr_5^{3-}$  ( $Tr = Si-Sn$ ) and  $BTr_4Pn^{2-}$  ( $Pn = P-Bi$  for  $Tr = Si$  and  $Pn = As-Bi$  for  $Tr = Ge$ ), at the PBE0-D3/def2-TZVP level

| System                           | $r_{Tr-Tr}$ | $r_{Tr-B}$ | $r_{Tr-Pn}$ | $r_{Pn-B}$ | $q(Tr)$    | $q(B)$ | $q(Pn)$ | WBI $_{Tr-Tr}$ | WBI $_{Tr-B}$ | WBI $_{Tr-Pn}$ | WBI $_{Pn-B}$ |
|----------------------------------|-------------|------------|-------------|------------|------------|--------|---------|----------------|---------------|----------------|---------------|
| <b>BSi<math>_5^{3-}</math></b>   | 2.40        | 2.04       | -           | -          | -0.36      | -1.18  | -       | 0.81           | 0.81          | -              | -             |
| <b>BGe<math>_5^{3-}</math></b>   | 2.52        | 2.15       | -           | -          | -0.40      | -1.00  | -       | 0.80           | 0.82          | -              | -             |
| <b>BSn<math>_5^{3-}</math></b>   | 2.85        | 2.42       | -           | -          | -0.38      | -1.09  | -       | 0.79           | 0.80          | -              | -             |
| <b>BSi<math>_4P^{2-}</math></b>  | 2.35-2.43   | 1.99-2.04  | 2.31        | 1.92       | -0.05-0.16 | -1.16  | -0.39   | 0.68-0.89      | 0.66-0.89     | 0.70           | 0.93          |
| <b>BSi<math>_4As^{2-}</math></b> | 2.33-2.43   | 1.99-2.06  | 2.42        | 2.05       | -0.10-0.15 | -1.17  | -0.32   | 0.64-0.93      | 0.69-0.91     | 0.70           | 0.86          |
| <b>BGe<math>_4As^{2-}</math></b> | 2.46-2.55   | 2.10-2.16  | 2.49        | 2.07       | -0.10-0.15 | -1.01  | -0.36   | 0.64-0.90      | 0.68-0.90     | 0.68           | 0.91          |
| <b>BSi<math>_4Sb^{2-}</math></b> | 2.3-2.45    | 1.99-2.09  | 2.62        | 2.29       | -0.1-0.18  | -1.18  | -0.21   | 0.57-0.98      | 0.74-0.93     | 0.71           | 0.69          |
| <b>BGe<math>_4Sb^{2-}</math></b> | 2.44-2.57   | 2.09-2.19  | 2.67        | 2.31       | -0.14-0.19 | -1.07  | -0.24   | 0.56-0.95      | 0.73-0.94     | 0.71           | 0.72          |
| <b>BSi<math>_4Bi^{2-}</math></b> | 2.30-2.46   | 1.99-2.10  | 2.70        | 2.39       | -0.1-0.20  | -1.15  | -0.22   | 0.55-1.02      | 0.76-0.94     | 0.70           | 0.64          |
| <b>BGe<math>_4Bi^{2-}</math></b> | 2.43-2.59   | 2.09-2.20  | 2.75        | 2.42       | -0.14-0.21 | -1.04  | -0.24   | 0.54-0.99      | 0.75-0.95     | 0.70           | 0.67          |

|                        | Tr-LPs<br>Pn-LPs                                                                    | Tr-B-Tr $\sigma$ -bonds<br>Tr-B-Pn $\sigma$ -bonds                                  | B-Tr $_4$ Pn $\pi$ bonds                                                             |
|------------------------|-------------------------------------------------------------------------------------|-------------------------------------------------------------------------------------|--------------------------------------------------------------------------------------|
|                        | 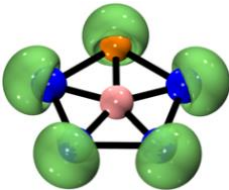 |  |  |
|                        | 5 x 1c-2e                                                                           | 5 x 3c-2e                                                                           | 3x 6c-2e                                                                             |
| <b>B, Tr=Si, Pn=P</b>  | ON = 1.84-1.89  e                                                                   | ON = 1.99  e                                                                        | ON = 2.00  e                                                                         |
| <b>B, Tr=Si, Pn=As</b> | ON = 1.8-1.91  e                                                                    | ON = 1.99  e                                                                        | ON = 2.00  e                                                                         |
| <b>B, Tr=Si, Pn=Sb</b> | ON = 1.83-1.93  e                                                                   | ON = 1.99  e                                                                        | ON = 2.00  e                                                                         |
| <b>B, Tr=Si, Pn=Bi</b> | ON = 1.82-1.94  e                                                                   | ON = 1.99  e                                                                        | ON = 2.00  e                                                                         |
| <b>B, Tr=Ge, Pn=As</b> | ON = 1.87-1.91  e                                                                   | ON = 1.99  e                                                                        | ON = 2.00  e                                                                         |
| <b>B, Tr=Ge, Pn=Sb</b> | ON = 1.86-1.93  e                                                                   | ON = 1.99  e                                                                        | ON = 2.00  e                                                                         |
| <b>B, Tr=Ge, Pn=Bi</b> | ON = 1.86-1.94  e                                                                   | ON = 1.99  e                                                                        | ON = 2.00  e                                                                         |

**Figure S15.** Adaptive Natural Density Partitioning bonding pattern for  $BTr_4Pn^{2-}$  ( $Pn = P-Bi$  for  $Tr = Si$  and  $Pn = As-Bi$  for  $Tr = Ge$ ) at the PBE0-D3/def2-TZVP level.

**Table S4.** Energy components of IQA and delocalization indices ( $\delta$ ) between atom pairs for  $BTr_4Pn^{2-}$  ( $Pn = P-Bi$  for  $Tr = Si$  and  $Pn = As-Bi$  for  $Tr = Ge$ ).  $\Delta E_{IQA}$  is the total integration error in IQA energies,  $V_{IQA}^{int}$ ,  $V_C^{int}$ , and  $V_{XC}^{int}$  are interatomic IQA interaction energy, Coulomb energy component, and exchange-correlation energy component of the interaction energy, respectively, in  $\text{kcal}\cdot\text{mol}^{-1}$ .

|                        | $BSi_4P^{2-}$ | $BSi_4As^{2-}$ | $BSi_4Sb^{2-}$ | $BSi_4Bi^{2-}$ | $BGe_4As^{2-}$ | $BGe_4Sb^{2-}$ | $BGe_4Bi^{2-}$ |
|------------------------|---------------|----------------|----------------|----------------|----------------|----------------|----------------|
| $\Delta E_{IQA}$       | 0.0           | 0.0            | 0.0            | 0.0            | 0.0            | 0.0            | 0.0            |
| $V_{IQA}^{int}(B-Tr)$  | -410.9/-505.1 | -393.0/-509.6  | -338.8/-509.7  | -319.3/-496.2  | -114.9/-139.0  | -112.4/-145.3  | -109.8/-144.8  |
| $V_C^{int}(B-Tr)$      | -305.6/-357.9 | -280.9/-362.4  | -219.5/-364.5  | -199.8/-351.5  | -22.6/-20.3    | -14.2/-23.5    | -11.1/-22.7    |
| $V_{XC}^{int}(B-Tr)$   | -105.3/-147.2 | -112.1/-147.2  | -119.3/-145.2  | -119.5/-144.7  | -92.3/-118.7   | -98.2/-121.8   | -98.7/-122.1   |
| $V_{IQA}^{int}(B-Pn)$  | 66.6          | -4.3           | -110.9         | -90.5          | -94.6          | -101.9         | -85.5          |
| $V_C^{int}(B-Pn)$      | 252.5         | 157.7          | 12.9           | 18.8           | 41.7           | 3.6            | 7.7            |
| $V_{XC}^{int}(B-Pn)$   | -185.9        | -162.0         | -123.8         | -109.3         | -136.3         | -105.5         | -93.1          |
| $V_{IQA}^{int}(Tr-Tr)$ | 22.5/26.4     | 10.6/28.3      | -10.9/33.8     | -17.9/33.1     | -81.9/-58.6    | -85.8/-53.5    | -88.3/-51.5    |
| $V_C^{int}(Tr-Tr)$     | 95.1/84.9     | 87.7/84.5      | 74.8/85.0      | 71.8/82.6      | 19.4/18.4      | 19.5/17.3      | 19.8/16.8      |
| $V_{XC}^{int}(Tr-Tr)$  | -72.5/-58.4   | -77.1/-56.2    | -85.7/-51.2    | -89.7/-49.6    | -101.3/-77.1   | -105.2/-70.8   | -108.1/-68.3   |
| $V_{IQA}^{int}(Tr-Pn)$ | -194.3        | -123.6         | -67.5          | -66.0          | -90.3          | -72.8          | -69.8          |
| $V_C^{int}(Tr-Pn)$     | -101.1        | -35.1          | 17.4           | 15.0           | 5.3            | 16.8           | 15.2           |
| $V_{XC}^{int}(Tr-Pn)$  | -93.2         | -88.4          | -84.9          | -81.0          | -95.6          | -89.6          | -85.0          |
| $\delta(B-Tr)$         | 0.8/1.1       | 0.9/1.1        | 0.9/1.1        | 0.9/1.1        | 0.7/0.9        | 0.8/1.0        | 0.8/1.0        |
| $\delta(B-Pn)$         | 1.3           | 1.2            | 1.0            | 0.9            | 1.0            | 0.8            | 0.8            |
| $\delta(Tr-Tr)$        | 0.7/0.6       | 0.8/0.5        | 0.8/0.5        | 0.8/0.5        | 1.0/0.7        | 1.0/0.7        | 1.0/0.6        |
| $\delta(Tr-Pn)$        | 0.8           | 0.8            | 0.8            | 0.8            | 0.9            | 0.9            | 0.9            |

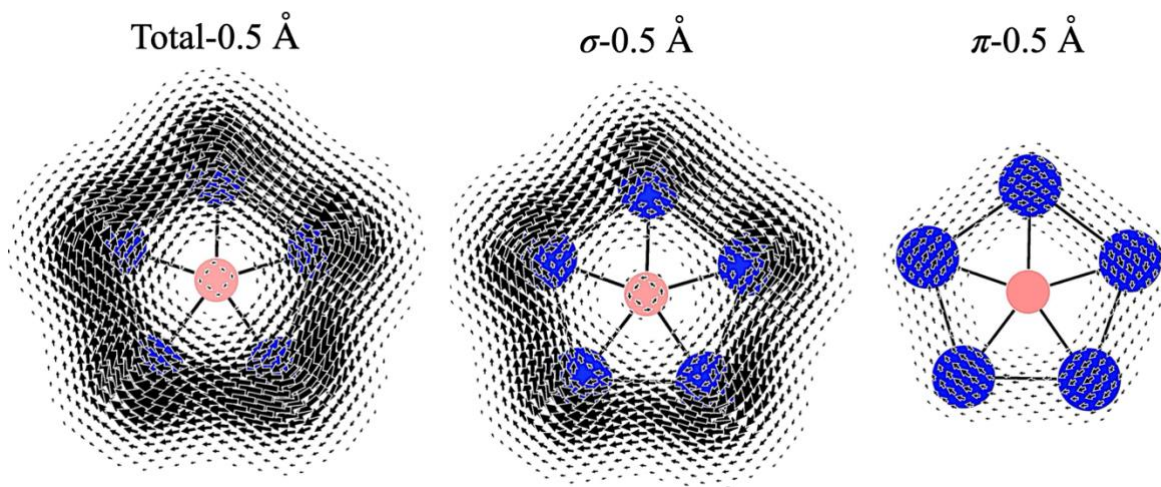

| System   | $BSi_5^{3-}$ | $BGe_5^{3-}$ | $BSn_5^{3-}$ | $BSi_4P^{2-}$ | $BSi_4As^{2-}$ | $BSi_4Sb^{2-}$ | $BSi_4Bi^{2-}$ | $BGe_4As^{2-}$ | $BGe_4Sb^{2-}$ | $BGe_4Bi^{2-}$ |
|----------|--------------|--------------|--------------|---------------|----------------|----------------|----------------|----------------|----------------|----------------|
| Total    | 32.5         | 37.5         | 38.7         | 31.5          | 31.6           | 32.7           | 32.8           | 35.7           | 36.1           | 35.9           |
| $\sigma$ | 21.0         | 25.5         | 26.9         | 21.3          | 22.3           | 23.5           | 23.9           | 25.1           | 26.3           | 26.7           |
| $\pi$    | 11.5         | 11.9         | 11.9         | 10.4          | 10.1           | 8.9            | 8.2            | 10.7           | 9.5            | 8.7            |

**Figure S16.** Vector plots in the molecular plane  $0.5 \text{ \AA}$  above the molecular plane for  $BTr_4Pn^{2-}$  ( $Pn = P-Bi$  for  $Tr = Si$  and  $Pn = As-Bi$  for  $Tr = Ge$ ) system and RCSs (total,  $\sigma$  and  $\pi$ , in  $\text{nA/T}$ ) for each system at the PBE0-D3/def2-TZVP level.

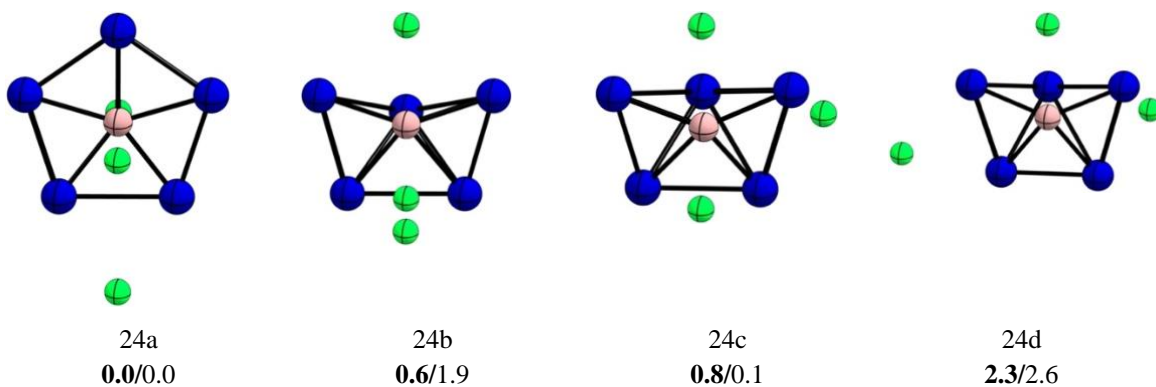

**Figure S17.** Global minimum and low-lying isomers of cluster  $\text{BLi}_3\text{Si}_5$ . Relative energies are shown in  $\text{kcal}\cdot\text{mol}^{-1}$  at DLPNO-CCSD(T)/CSB//PBE0-D3/def2-TZVP (in **bold**) and PBE0-D3/def2-TZVP levels, including zero-point energy (ZPE) corrections.

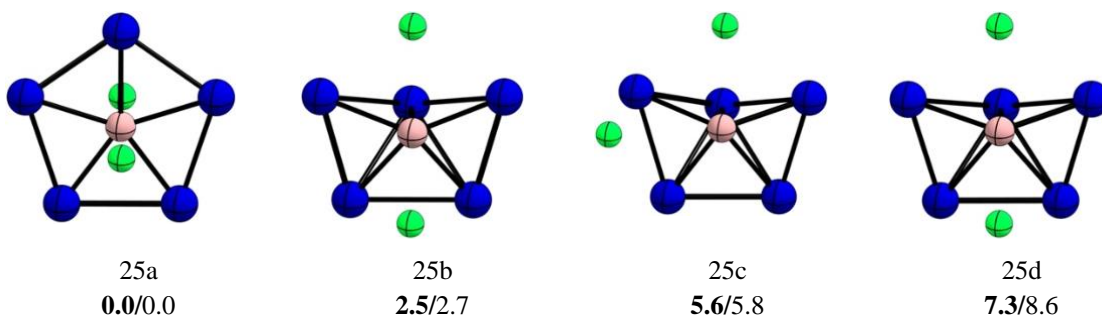

**Figure S18.** Global minimum and low-lying isomers of cluster  $\text{BLi}_2\text{Si}_5^-$ . Relative energies are shown in  $\text{kcal}\cdot\text{mol}^{-1}$  at DLPNO-CCSD(T)/CSB//PBE0-D3/def2-TZVP (in **bold**) and PBE0-D3/def2-TZVP levels, including zero-point energy (ZPE) corrections.

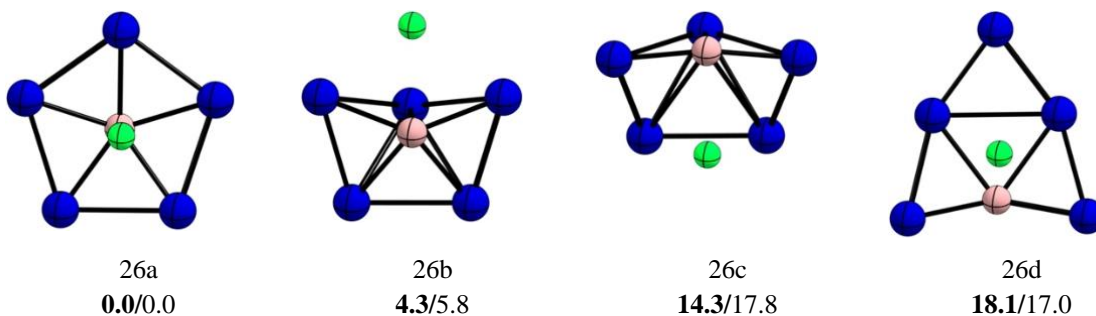

**Figure S19.** Global minimum and low-lying isomers of cluster  $\text{BLiSi}_5^{2-}$ . Relative energies are shown in  $\text{kcal}\cdot\text{mol}^{-1}$  at DLPNO-CCSD(T)/CSB//PBE0-D3/def2-TZVP (in **bold**) and PBE0-D3/def2-TZVP levels, including zero-point energy (ZPE) corrections.

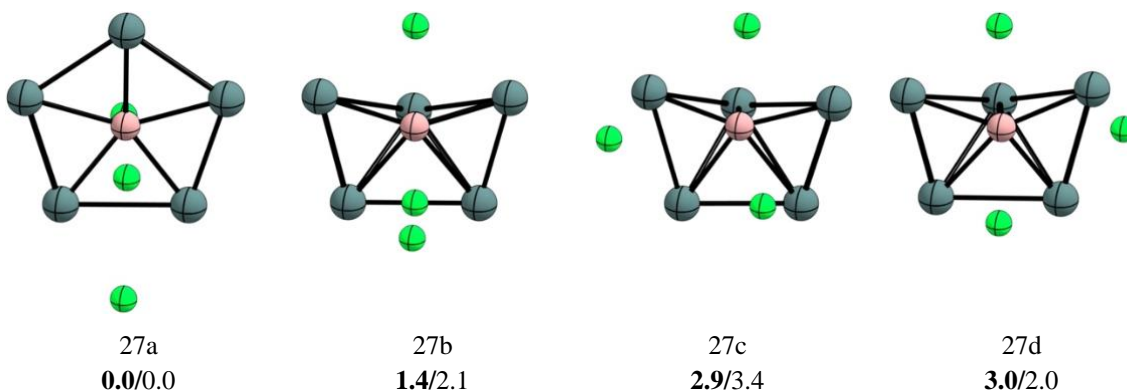

**Figure S20.** Global minimum and low-lying isomers of cluster  $\text{BLi}_3\text{Ge}_5$ . Relative energies are shown in  $\text{kcal}\cdot\text{mol}^{-1}$  at DLPNO-CCSD(T)/CSB//PBE0-D3/def2-TZVP (in bold) and PBE0-D3/def2-TZVP levels, including zero-point energy (ZPE) corrections.

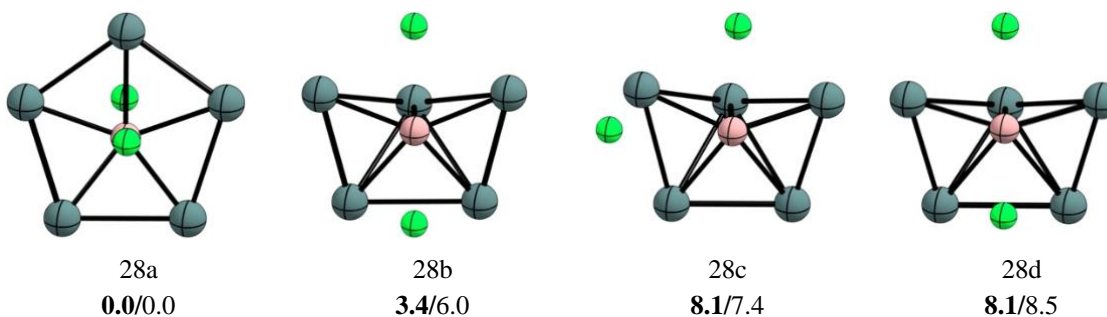

**Figure S21.** Global minimum and low-lying isomers of cluster  $\text{BLi}_2\text{Ge}_5^-$ . Relative energies are shown in  $\text{kcal}\cdot\text{mol}^{-1}$  at DLPNO-CCSD(T)/CSB//PBE0-D3/def2-TZVP (in bold) and PBE0-D3/def2-TZVP levels, including zero-point energy (ZPE) corrections.

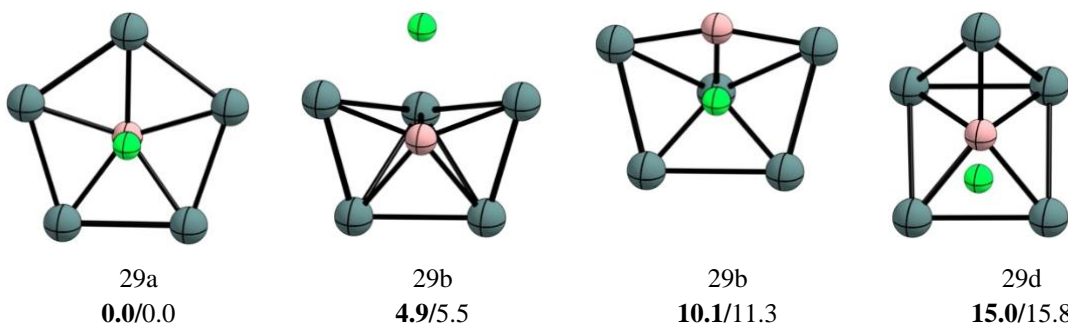

**Figure S22.** Global minimum and low-lying isomers of cluster  $\text{BLiGe}_5^{2-}$ . Relative energies are shown in  $\text{kcal}\cdot\text{mol}^{-1}$  at DLPNO-CCSD(T)/CSB//PBE0-D3/def2-TZVP (in bold) and PBE0-D3/def2-TZVP levels, including zero-point energy (ZPE) corrections.

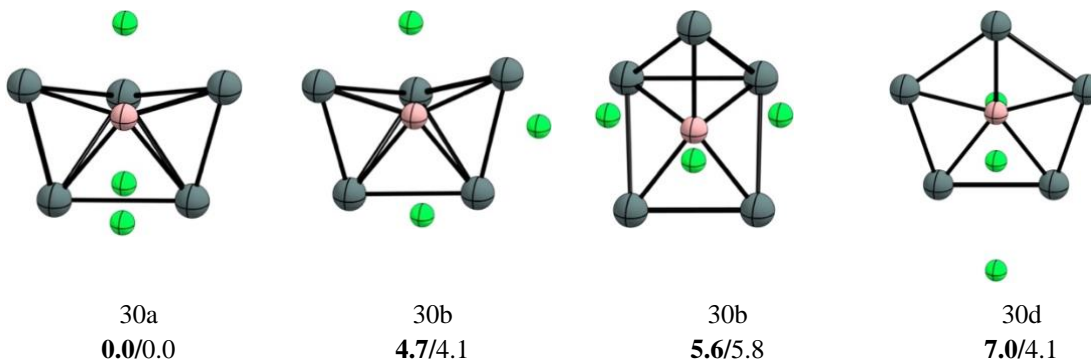

**Figure S23.** Global minimum and low-lying isomers of cluster  $\text{BLi}_3\text{Sn}_5$ . Relative energies are shown in  $\text{kcal}\cdot\text{mol}^{-1}$  at DLPNO-CCSD(T)/CSB//PBE0-D3/def2-TZVP (**in bold**) and PBE0-D3/def2-TZVP levels, including zero-point energy (ZPE) corrections.

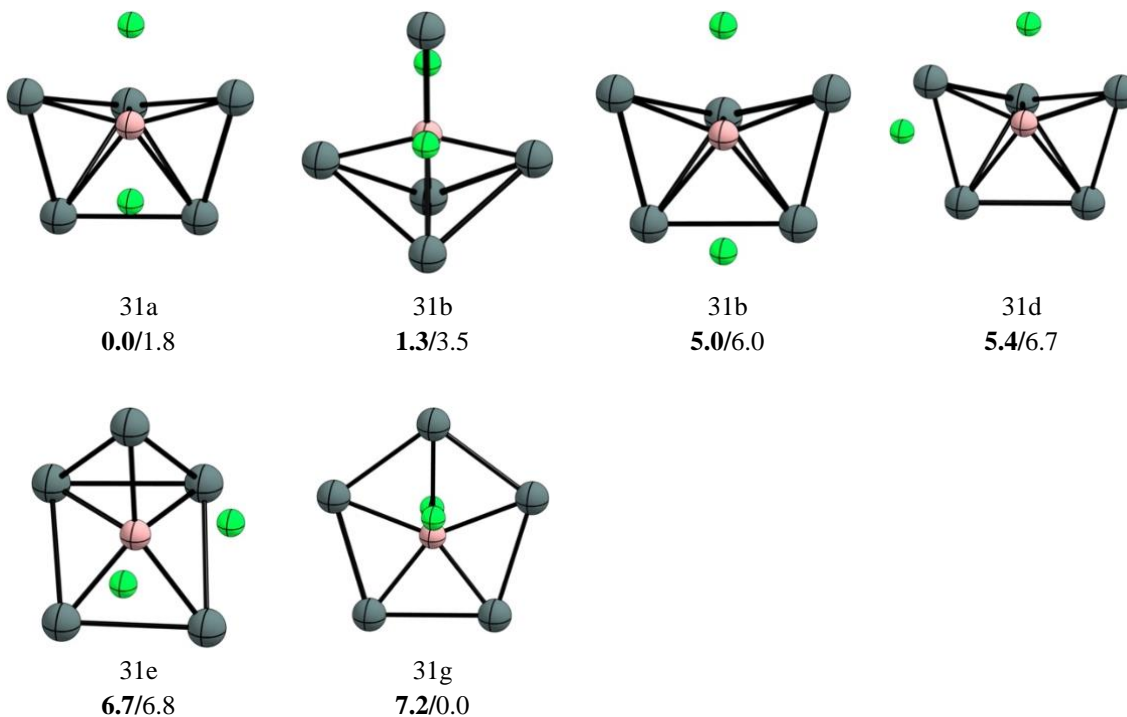

**Figure S24.** Global minimum and low-lying isomers of cluster  $\text{BLi}_2\text{Sn}_5^-$ . Relative energies are shown in  $\text{kcal}\cdot\text{mol}^{-1}$  at DLPNO-CCSD(T)/CSB//PBE0-D3/def2-TZVP (**in bold**) and PBE0-D3/def2-TZVP levels, including zero-point energy (ZPE) corrections.



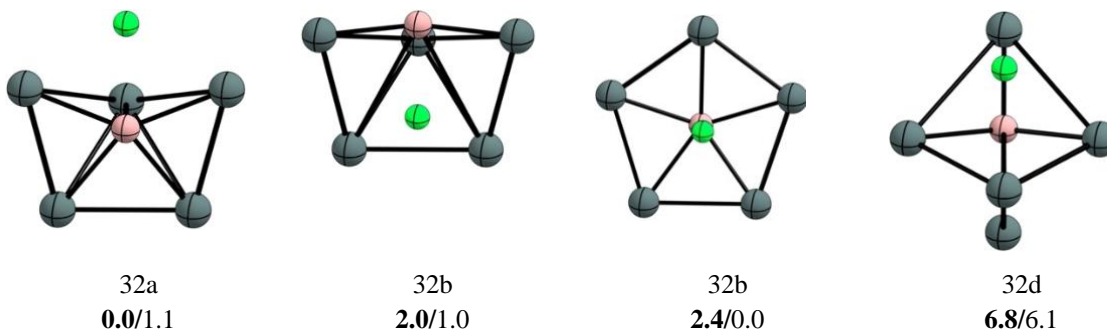

**Figure S25.** Global minimum and low-lying isomers of cluster  $\text{BLiSn}_5^{2-}$ . Relative energies are shown in  $\text{kcal}\cdot\text{mol}^{-1}$  at DLPNO-CCSD(T)/CSB//PBE0-D3/def2-TZVP (in bold) and PBE0-D3/def2-TZVP levels, including zero-point energy (ZPE) corrections.

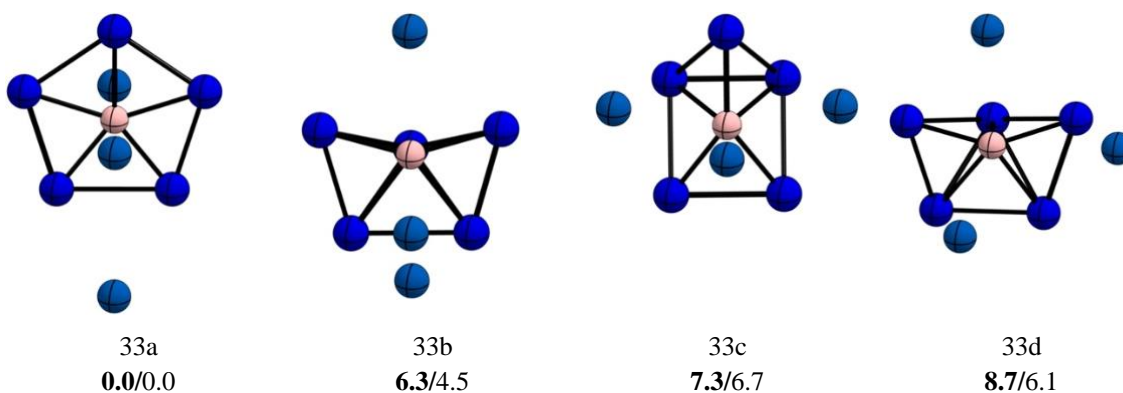

**Figure S26.** Global minimum and low-lying isomers of cluster  $\text{BNa}_3\text{Si}_5$ . Relative energies are shown in  $\text{kcal}\cdot\text{mol}^{-1}$  at DLPNO-CCSD(T)/CSB//PBE0-D3/def2-TZVP (in bold) and PBE0-D3/def2-TZVP levels, including zero-point energy (ZPE) corrections.

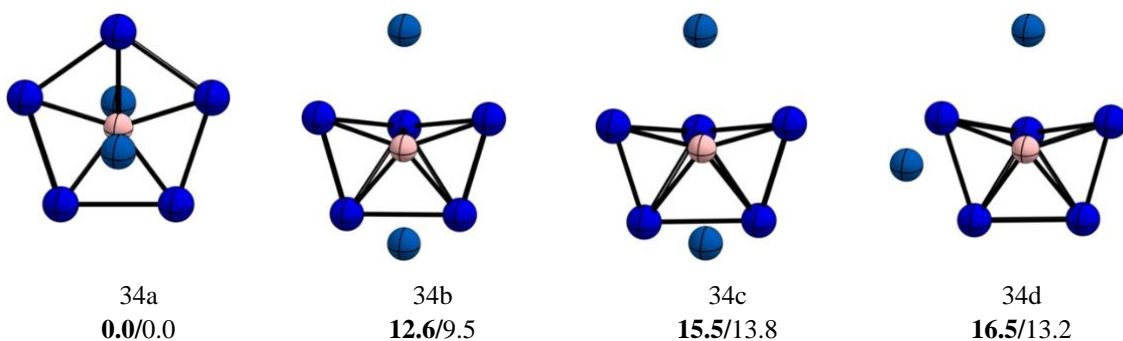

**Figure S27.** Global minimum and low-lying isomers of cluster  $\text{BNa}_2\text{Si}_5^-$ . Relative energies are shown in  $\text{kcal}\cdot\text{mol}^{-1}$  at DLPNO-CCSD(T)/CSB//PBE0-D3/def2-TZVP (in bold) and PBE0-D3/def2-TZVP levels, including zero-point energy (ZPE) corrections.

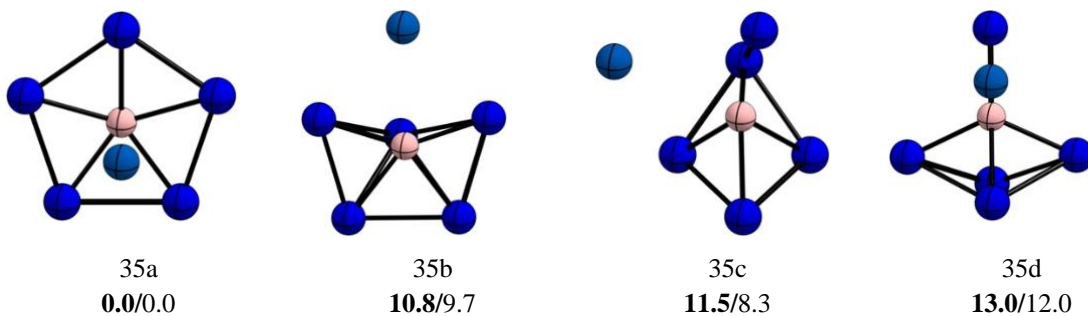

**Figure S28.** Global minimum and low-lying isomers of cluster  $\text{BNaSi}_5^{2-}$ . Relative energies are shown in  $\text{kcal}\cdot\text{mol}^{-1}$  at DLPNO-CCSD(T)/CSB//PBE0-D3/def2-TZVP (**in bold**) and PBE0-D3/def2-TZVP levels, including zero-point energy (ZPE) corrections.

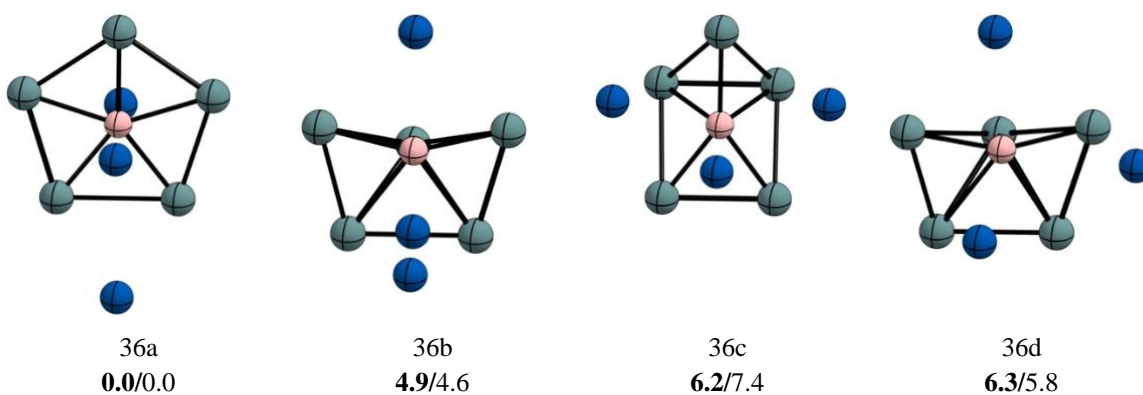

**Figure S29.** Global minimum and low-lying isomers of cluster  $\text{BNa}_3\text{Ge}_5$ . Relative energies are shown in  $\text{kcal}\cdot\text{mol}^{-1}$  at DLPNO-CCSD(T)/CSB//PBE0-D3/def2-TZVP (**in bold**) and PBE0-D3/def2-TZVP levels, including zero-point energy (ZPE) corrections.

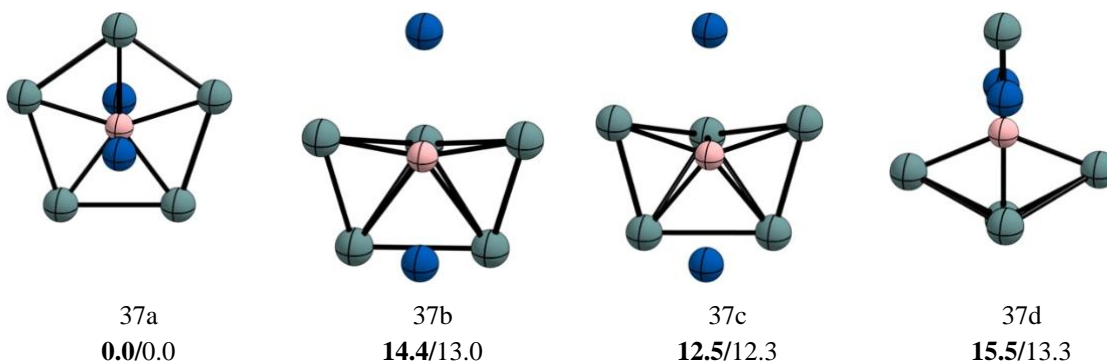

**Figure S30.** Global minimum and low-lying isomers of cluster  $\text{BNa}_2\text{Ge}_5^-$ . Relative energies are shown in  $\text{kcal}\cdot\text{mol}^{-1}$  at DLPNO-CCSD(T)/CSB//PBE0-D3/def2-TZVP (**in bold**) and PBE0-D3/def2-TZVP levels, including zero-point energy (ZPE) corrections.

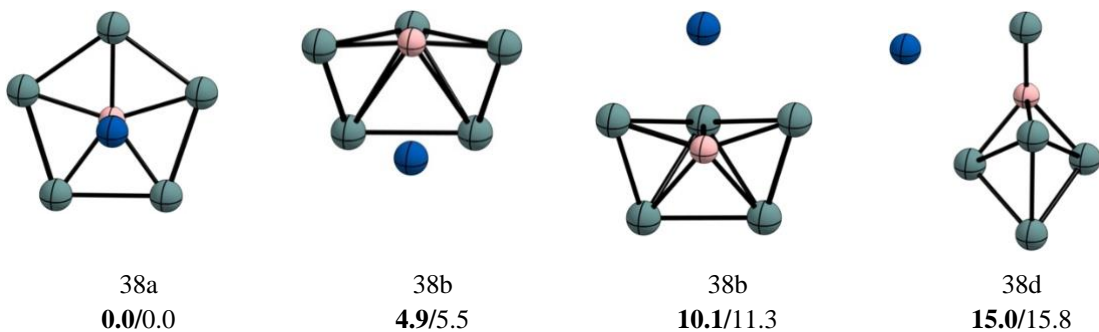

**Figure S31.** Global minimum and low-lying isomers of cluster  $\text{BNaGe}_5^{2-}$ . Relative energies are shown in  $\text{kcal}\cdot\text{mol}^{-1}$  at DLPNO-CCSD(T)/CSB//PBE0-D3/def2-TZVP (in bold) and PBE0-D3/def2-TZVP levels, including zero-point energy (ZPE) corrections.

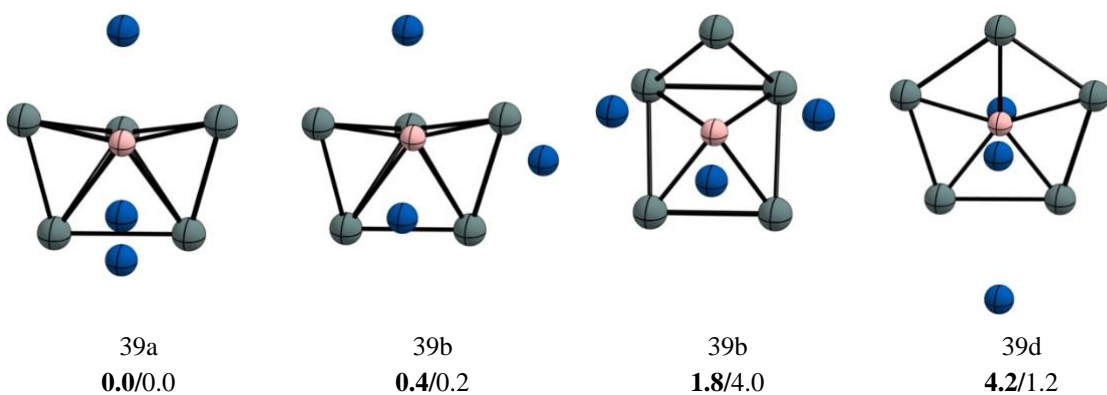

**Figure S32.** Global minimum and low-lying isomers of cluster  $\text{BNa}_3\text{Sn}_5$ . Relative energies are shown in  $\text{kcal}\cdot\text{mol}^{-1}$  at DLPNO-CCSD(T)/CSB//PBE0-D3/def2-TZVP (in bold) and PBE0-D3/def2-TZVP levels, including zero-point energy (ZPE) corrections.

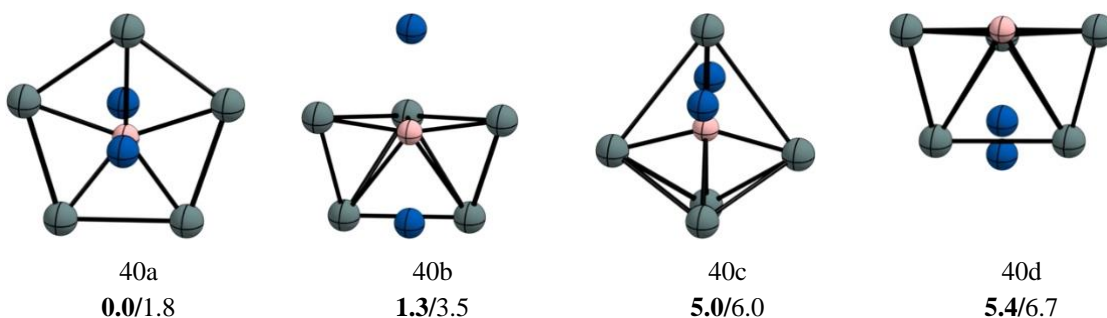

**Figure S33.** Global minimum and low-lying isomers of cluster  $\text{BNa}_2\text{Sn}_5^-$ . Relative energies are shown in  $\text{kcal}\cdot\text{mol}^{-1}$  at DLPNO-CCSD(T)/CSB//PBE0-D3/def2-TZVP (in bold) and PBE0-D3/def2-TZVP levels, including zero-point energy (ZPE) corrections.

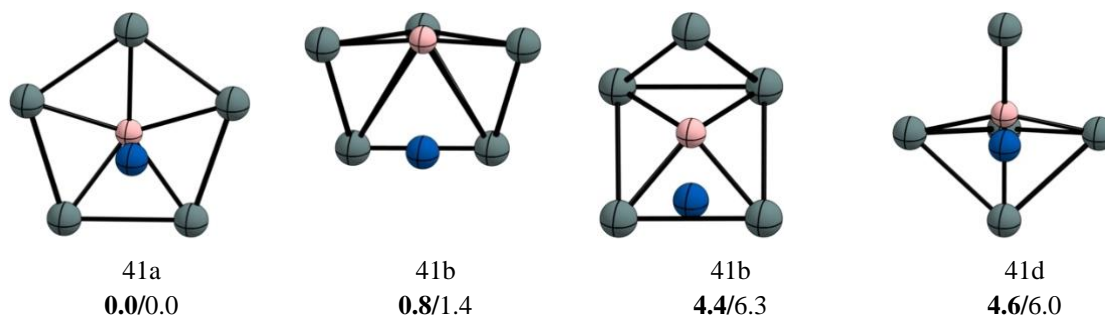

**Figure S34.** Global minimum and low-lying isomers of cluster  $\text{BNaSn}_5^{2-}$ . Relative energies are shown in  $\text{kcal}\cdot\text{mol}^{-1}$  at DLPNO-CCSD(T)/CSB//PBE0-D3/def2-TZVP (**in bold**) and PBE0-D3/def2-TZVP levels, including zero-point energy (ZPE) corrections.

**Table S5.** HOMO-LUMO energy gap in eV of the global minimum of  $\text{BTr}_5^{3-}$  (Tr = Si-Sn) and  $\text{BTr}_4\text{Pn}^{2-}$  (Tr = Si, Ge and Pn = P-Bi) in vacuum at PBE0-D3/def2-TZVP level of theory.

| System                                         | $E_{\text{HOMO}}$ | $E_{\text{LUMO}}$ | $\Delta E_{\text{H-L}}$ |
|------------------------------------------------|-------------------|-------------------|-------------------------|
| <b><math>\text{BSi}_5^{3-}</math></b>          | 7.2               | 10.8              | 3.6                     |
| <b><math>\text{BGe}_5^{3-}</math></b>          | 7.5               | 10.9              | 3.4                     |
| <b><math>\text{BSn}_5^{3-}</math></b>          | 6.1               | 8.7               | 2.5                     |
| <b><math>\text{BSi}_4\text{P}^{2-}</math></b>  | 3.2               | 6.5               | 3.3                     |
| <b><math>\text{BSi}_4\text{As}^{2-}</math></b> | 3.2               | 6.6               | 3.4                     |
| <b><math>\text{BGe}_4\text{As}^{2-}</math></b> | 3.4               | 6.7               | 3.3                     |
| <b><math>\text{BSi}_4\text{Sb}^{2-}</math></b> | 3.0               | 6.6               | 3.5                     |
| <b><math>\text{BGe}_4\text{Sb}^{2-}</math></b> | 2.9               | 6.4               | 3.5                     |
| <b><math>\text{BSi}_4\text{Bi}^{2-}</math></b> | 3.1               | 6.6               | 3.6                     |
| <b><math>\text{BGe}_4\text{Bi}^{2-}</math></b> | 3.1               | 6.3               | 3.1                     |

**Table S6.** HOMO-LUMO energy gap in eV of the global minimum of  $\text{BTr}_5^{3-}$  (Tr = Si-Sn) and  $\text{BTr}_4\text{Pn}^{2-}$  (Tr = Si, Ge and Pn = P-Bi) in conjunction with the implicit solvent model provided by the Polarizable Continuum Model (PCM) at PBE0-D3/def2-TZVP level of theory.

| System                                         | $E_{\text{HOMO}}$ | $E_{\text{LUMO}}$ | $\Delta E_{\text{H-L}}$ |
|------------------------------------------------|-------------------|-------------------|-------------------------|
| <b><math>\text{BSi}_5^{3-}</math></b>          | -3.6              | 0.1               | 3.7                     |
| <b><math>\text{BGe}_5^{3-}</math></b>          | -3.7              | -0.1              | 3.6                     |
| <b><math>\text{BSn}_5^{3-}</math></b>          | -3.1              | -0.1              | 3.0                     |
| <b><math>\text{BSi}_4\text{P}^{2-}</math></b>  | -4.2              | -0.6              | 3.5                     |
| <b><math>\text{BSi}_4\text{As}^{2-}</math></b> | -4.2              | -0.7              | 3.5                     |

|                                       |      |      |     |
|---------------------------------------|------|------|-----|
| <b>BGe<sub>4</sub>As<sup>2-</sup></b> | -4.1 | -0.8 | 3.3 |
| <b>BSi<sub>4</sub>Sb<sup>2-</sup></b> | -4.2 | -0.8 | 3.4 |
| <b>BGe<sub>4</sub>Sb<sup>2-</sup></b> | -4.2 | -0.9 | 3.3 |
| <b>BSi<sub>4</sub>Bi<sup>2-</sup></b> | -4.2 | -0.8 | 3.4 |
| <b>BGe<sub>4</sub>Bi<sup>2-</sup></b> | -4.1 | -0.9 | 3.2 |

**Table S7.** HOMO-LUMO energy gap in eV for the global minimum of Li<sub>3</sub>BTr<sub>5</sub> (Tr = Si-Sn), Li<sub>2</sub>BSi<sub>4</sub>Pn and Li<sub>2</sub>BGe<sub>4</sub>Pn (Pn = P-Bi) at PBE0-D3/def2-TZVP level of theory.

| <b>System</b>                          | <b>E<sub>HOMO</sub></b> | <b>E<sub>LUMO</sub></b> | <b>ΔE<sub>H-L</sub></b> |
|----------------------------------------|-------------------------|-------------------------|-------------------------|
| <b>Li<sub>3</sub>BSi<sub>5</sub></b>   | -4.9                    | -1.4                    | 3.5                     |
| <b>Li<sub>3</sub>BGe<sub>5</sub></b>   | -4.9                    | -1.4                    | 3.5                     |
| <b>Li<sub>3</sub>BSn<sub>5</sub></b>   | -4.6                    | -1.7                    | 2.9                     |
| <b>Li<sub>2</sub>BSi<sub>4</sub>As</b> | -5.7                    | -1.9                    | 3.8                     |
| <b>Li<sub>2</sub>BGe<sub>4</sub>As</b> | -5.5                    | -1.7                    | 3.8                     |
| <b>Li<sub>2</sub>BSi<sub>4</sub>P</b>  | -5.7                    | -1.9                    | 3.8                     |
| <b>Li<sub>2</sub>BSi<sub>4</sub>Sb</b> | -5.6                    | -1.8                    | 3.8                     |
| <b>Li<sub>2</sub>BGe<sub>4</sub>Sb</b> | -5.6                    | -1.8                    | 3.8                     |
| <b>Li<sub>2</sub>BSi<sub>4</sub>Bi</b> | -5.5                    | -1.8                    | 3.7                     |
| <b>Li<sub>2</sub>BGe<sub>4</sub>Bi</b> | -5.6                    | -1.8                    | 3.6                     |

## Cartesian Coordinates

Cartesian coordinates of the global minima of BSi<sub>5</sub><sup>3-</sup>, BGe<sub>5</sub><sup>3-</sup>, BSn<sub>5</sub><sup>3-</sup>, BSi<sub>4</sub>P<sup>2-</sup>, BSi<sub>4</sub>As<sup>2-</sup>, BGe<sub>4</sub>As<sup>2-</sup>, BSi<sub>4</sub>Sb<sup>2-</sup>, BGe<sub>4</sub>Sb<sup>2-</sup>, BSi<sub>4</sub>Bi<sup>2-</sup> and BGe<sub>4</sub>Bi<sup>2-</sup> their smallest vibrational frequencies in cm<sup>-1</sup> at the PBE0- D3/def2-TZVP level.

|                                     |             |             |            |                                       |             |             |             |
|-------------------------------------|-------------|-------------|------------|---------------------------------------|-------------|-------------|-------------|
| <b>BSi<sub>5</sub><sup>3-</sup></b> |             |             |            | <b>BGe<sub>5</sub><sup>3-</sup></b>   |             |             |             |
| $\nu_{\min} = 177.1$                |             |             |            | $\nu_{\min} = 98.4$                   |             |             |             |
| B                                   | 0.00000000  | 0.00000000  | 0.00000000 | B                                     | 0.00000000  | 0.00000000  | 0.00000000  |
| Si                                  | 0.00000000  | 2.04563400  | 0.00000000 | Ge                                    | 0.00000000  | 2.15207800  | 0.00000000  |
| Si                                  | -1.94551300 | 0.63213600  | 0.00000000 | Ge                                    | -1.26496000 | -1.74106800 | 0.00000000  |
| Si                                  | -1.20239300 | -1.65495200 | 0.00000000 | Ge                                    | 2.04674800  | 0.66502900  | 0.00000000  |
| Si                                  | 1.20239300  | -1.65495200 | 0.00000000 | Ge                                    | 1.26496000  | -1.74106800 | 0.00000000  |
| Si                                  | 1.94551300  | 0.63213600  | 0.00000000 | Ge                                    | -2.04674800 | 0.66502900  | 0.00000000  |
| <b>BSn<sub>5</sub><sup>3-</sup></b> |             |             |            | <b>BSi<sub>4</sub>As<sup>2-</sup></b> |             |             |             |
| $\nu_{\min} = 56.4$                 |             |             |            | $\nu_{\min} = 154.1$                  |             |             |             |
| Sn                                  | 0.00000000  | 2.42825700  | 0.00000000 | Si                                    | 0.00000000  | 1.96630200  | 0.19249300  |
| Sn                                  | 1.42729400  | -1.96450100 | 0.00000000 | Si                                    | 0.00000000  | 1.21882000  | -2.02144100 |
| Sn                                  | -1.42729400 | -1.96450100 | 0.00000000 | Si                                    | 0.00000000  | -1.21882000 | -2.02144100 |
| Sn                                  | -2.30941000 | 0.75037300  | 0.00000000 | B                                     | 0.00000000  | 0.00000000  | -0.43962100 |
| B                                   | 0.00000000  | 0.00000000  | 0.00000000 | Si                                    | 0.00000000  | -1.96630200 | 0.19249300  |

|                                       |              |              |              |                                       |             |              |              |
|---------------------------------------|--------------|--------------|--------------|---------------------------------------|-------------|--------------|--------------|
| Sn                                    | 2.309410000  | 0.750373000  | 0.000000000  | As                                    | 0.000000000 | 0.000000000  | 1.618444000  |
| <b>BGe<sub>4</sub>As<sup>2-</sup></b> |              |              |              | <b>BSi<sub>4</sub>P<sup>2-</sup></b>  |             |              |              |
| $v_{\min} = 98.3$                     |              |              |              | $v_{\min} = 177.1$                    |             |              |              |
| Ge                                    | 0.000062000  | -0.642360000 | 2.062346000  | Si                                    | 0.000000000 | 1.937472000  | 0.618039000  |
| Ge                                    | 0.000062000  | -0.642360000 | -2.062346000 | Si                                    | 0.000000000 | 1.215563000  | -1.622512000 |
| Ge                                    | 0.000062000  | 1.695108000  | 1.279777000  | Si                                    | 0.000000000 | -1.215563000 | -1.622512000 |
| Ge                                    | 0.000062000  | 1.695108000  | -1.279777000 | B                                     | 0.000000000 | 0.000000000  | -0.038767000 |
| As                                    | -0.000266000 | -2.045505000 | 0.000000000  | Si                                    | 0.000000000 | -1.937472000 | 0.618039000  |
| B                                     | 0.000168000  | 0.025166000  | 0.000000000  | P                                     | 0.000000000 | 0.000000000  | 1.887937000  |
| <b>BSi<sub>4</sub>Sb<sup>2-</sup></b> |              |              |              | <b>BGe<sub>4</sub>Sb<sup>2-</sup></b> |             |              |              |
| $v_{\min} = 136.5$                    |              |              |              | $v_{\min} = 85.7$                     |             |              |              |
| Si                                    | 0.000000000  | 2.005865000  | -0.199402000 | Ge                                    | 0.000000000 | 2.098571000  | 0.358620000  |
| Si                                    | 0.000000000  | 1.226649000  | -2.375578000 | Ge                                    | 0.000000000 | -1.289780000 | -1.946268000 |
| Si                                    | 0.000000000  | -1.226649000 | -2.375578000 | Sb                                    | 0.000000000 | 0.000000000  | 2.021109000  |
| B                                     | 0.000000000  | 0.000000000  | -0.799900000 | Ge                                    | 0.000000000 | 1.289780000  | -1.946268000 |
| Si                                    | 0.000000000  | -2.005865000 | -0.199402000 | B                                     | 0.000000000 | 0.000000000  | -0.293426000 |
| Sb                                    | 0.000000000  | 0.000000000  | 1.492136000  | Ge                                    | 0.000000000 | -2.098571000 | 0.358620000  |
| <b>BSi<sub>4</sub>Bi<sup>2-</sup></b> |              |              |              | <b>BGe<sub>4</sub>Bi<sup>2-</sup></b> |             |              |              |
| $v_{\min} = 127.6$                    |              |              |              | $v_{\min} = 78.1$                     |             |              |              |
| Si                                    | 0.000000000  | 2.016692000  | -0.600964000 | Ge                                    | 0.000000000 | 2.108049000  | 0.009694000  |
| Si                                    | 0.000000000  | 1.232850000  | -2.763776000 | Ge                                    | 0.000000000 | -1.296269000 | -2.280902000 |
| Si                                    | 0.000000000  | -1.232850000 | -2.763776000 | Bi                                    | 0.000000000 | 0.000000000  | 1.789436000  |
| B                                     | 0.000000000  | 0.000000000  | -1.191535000 | Ge                                    | 0.000000000 | 1.296269000  | -2.280902000 |
| Si                                    | 0.000000000  | -2.016692000 | -0.600964000 | B                                     | 0.000000000 | 0.000000000  | -0.633179000 |
| Bi                                    | 0.000000000  | 0.000000000  | 1.206872000  | Ge                                    | 0.000000000 | -2.108049000 | 0.009694000  |

## References

- O. Yanez, R. Baez-Grez, D. Inostroza, W. A. Rabanal-Leon, R. Pino-Rios, J. Garza and W. Tiznado, *J. Chem. Theory Comput.*, 2019, **15**, 1463-1475.
- C. Adamo and V. Barone, *J. Chem. Phys.*, 1999, **110**, 6158-6170.
- S. Grimme, J. Antony, S. Ehrlich and H. Krieg, *J. Chem. Phys.*, 2010, **132**, 154104.
- P. Fuentealba, H. Preuss, H. Stoll and L. Von Szentpály, *Chem. Phys. Lett.*, 1982, **89**, 418-422.
- P. Fuentealba, L. v. Szentpaly, H. Preuss and H. Stoll, *J. Phys. B: Atom. Mol. Phys.*, 1985, **18**, 1287.
- W. Küchle, M. Dolg, H. Stoll and H. Preuss, *J. Chem. Phys.*, 1994, **100**, 7535-7542.
- W. Küchle, M. Dolg, H. Stoll and H. Preuss, *Mol. Phys.*, 1991, **74**, 1245-1263.
- A. Bergner, M. Dolg, W. Küchle, H. Stoll and H. Preuß, *Mol. Phys.*, 1993, **80**, 143-1441.
- F. Weigend and R. Ahlrichs, *Phys. Chem. Chem. Phys.*, 2005, **7**, 3297-3305.
- C. Riplinger and F. Neese, *J. Chem. Phys.*, 2013, **138**, 034106.
- C. Riplinger, P. Pinski, U. Becker, E. F. Valeev and F. Neese, *J. Chem. Phys.*, 2016, **144**, 024109.
- C. Riplinger, B. Sandhoefer, A. Hansen and F. Neese, *J. Chem. Phys.*, 2013, **139**, 134101.
- D. G. Truhlar, *Chem. Phys. Lett.*, 1998, **294**, 45-48.
- F. Neese, A. Hansen and D. G. Liakos, *J. Chem. Phys.*, 2009, **131**, 064103.
- M. J. Frisch, G. W. Trucks, H. B. Schlegel, G. E. Scuseria, M. A. Robb, J. R. Cheeseman, G. Scalmani, V. Barone, G. A. Petersson, H. Nakatsuji, X. Li, M. Caricato, A. V. Marenich, J. Bloino, B. G. Janesko, R. Gomperts, B. Mennucci, H. P. Hratchian, J. V. Ortiz, A. F. Izmaylov, J. L. Sonnenberg, Williams, F. Ding, F. Lipparini, F. Egidi, J. Goings, B. Peng, A. Petrone, T. Henderson, D. Ranasinghe, V. G. Zakrzewski, J. Gao, N. Rega, G. Zheng, W. Liang, M. Hada, M. Ehara, K. Toyota, R. Fukuda, J. Hasegawa, M. Ishida, T. Nakajima, Y. Honda, O. Kitao, H. Nakai, T. Vreven, K. Throssell, J. A. Montgomery Jr., J. E. Peralta, F. Ogliaro, M. J. Bearpark, J. J. Heyd, E. N.

- Brothers, K. N. Kudin, V. N. Staroverov, T. A. Keith, R. Kobayashi, J. Normand, K. Raghavachari, A. P. Rendell, J. C. Burant, S. S. Iyengar, J. Tomasi, M. Cossi, J. M. Millam, M. Klene, C. Adamo, R. Cammi, J. W. Ochterski, R. L. Martin, K. Morokuma, O. Farkas, J. B. Foresman and D. J. Fox, 2016
16. E. D. Glendening, C. R. Landis and F. Weinhold, *J. Comput. Chem.*, 2013, **34**, 1429-1437.
  17. D. Y. Zubarev and A. I. Boldyrev, *Phys. Chem. Chem. Phys.*, 2008, **10**, 5207-5217.
  18. D. Y. Zubarev and A. I. Boldyrev, *J. Org. Chem.*, 2008, **73**, 925-9258.
  19. T. Lu and F. Chen, *J. Comput. Chem.*, 2012, **33**, 580-592.
  20. Legault, C. Y. *CYLVIEW20*, Université de Sherbrooke: 2020.
  21. W. Humphrey, A. Dalke and K. Schulten, *J. Mol. Graph.*, 1996, **14**, 33-38, 27-38.
  22. A. M. n. Pendás, M. A. Blanco and E. Francisco, *J. Chem. Phys.*, 2004, **120**, 458-4592.
  23. A. M. Pendás, E. Francisco and M. A. Blanco, *J. Comput. Chem.*, 2005, **26**, 344-351.
  24. M. A. Blanco, A. Martín Pendás and E. Francisco, *J. Chem. Theory Comput.*, 2005, **1**, 1096-1109.
  25. A. M. Pendás, M. A. Blanco and E. Francisco, *J. Comput. Chem.*, 2007, **28**, 16-184.
  26. T. A. Keith, *TK Gristmill Software, Overland Parks, USA, 2019*.
  27. G. Monaco, F. F. Summa, R. Zanasi, *J. Chem. Inf. Model.* **2020**, *61*, 270-283.
